# Supplementary material for: Homoleptic titanium and zirconium complexes exhibiting unusual Oiminol–metal coordination: application in stereoselective ring-opening polymerization of lactide
Source: Royal Society of Chemistry journal article supplement (doi:10.1039/d1py00237f), 2021-01-01
Supplement: d1py00237f1.pdf [file d1py00237f1.pdf]

## Supporting Information

### **Homoleptic titanium and zirconium complexes exhibiting unusual O<sub>iminol</sub>-metal coordination: Application in stereoselective ring-opening polymerization of lactide**

Sagnik K. Roymuhury,<sup>a</sup> Mrinmay Mandal,<sup>‡a</sup> Debashis Chakraborty,<sup>\*b</sup> and Venkatachalam

Ramkumar<sup>b</sup>

<sup>a</sup>Department of Chemistry, Indian Institute of Technology Patna, Bihta 801103, Bihar, India.

<sup>b</sup>Department of Chemistry, Indian Institute of Technology Madras, Chennai-600 036, Tamil Nadu, India. Fax: +044-22574202; Tel: +044-22574223; E-mail: dchakraborty@iitm.ac.in.

<sup>‡</sup>Current address: School of Chemical and Biomolecular Engineering, Georgia Institute of Technology, Atlanta, GA 30332-0100, United States.

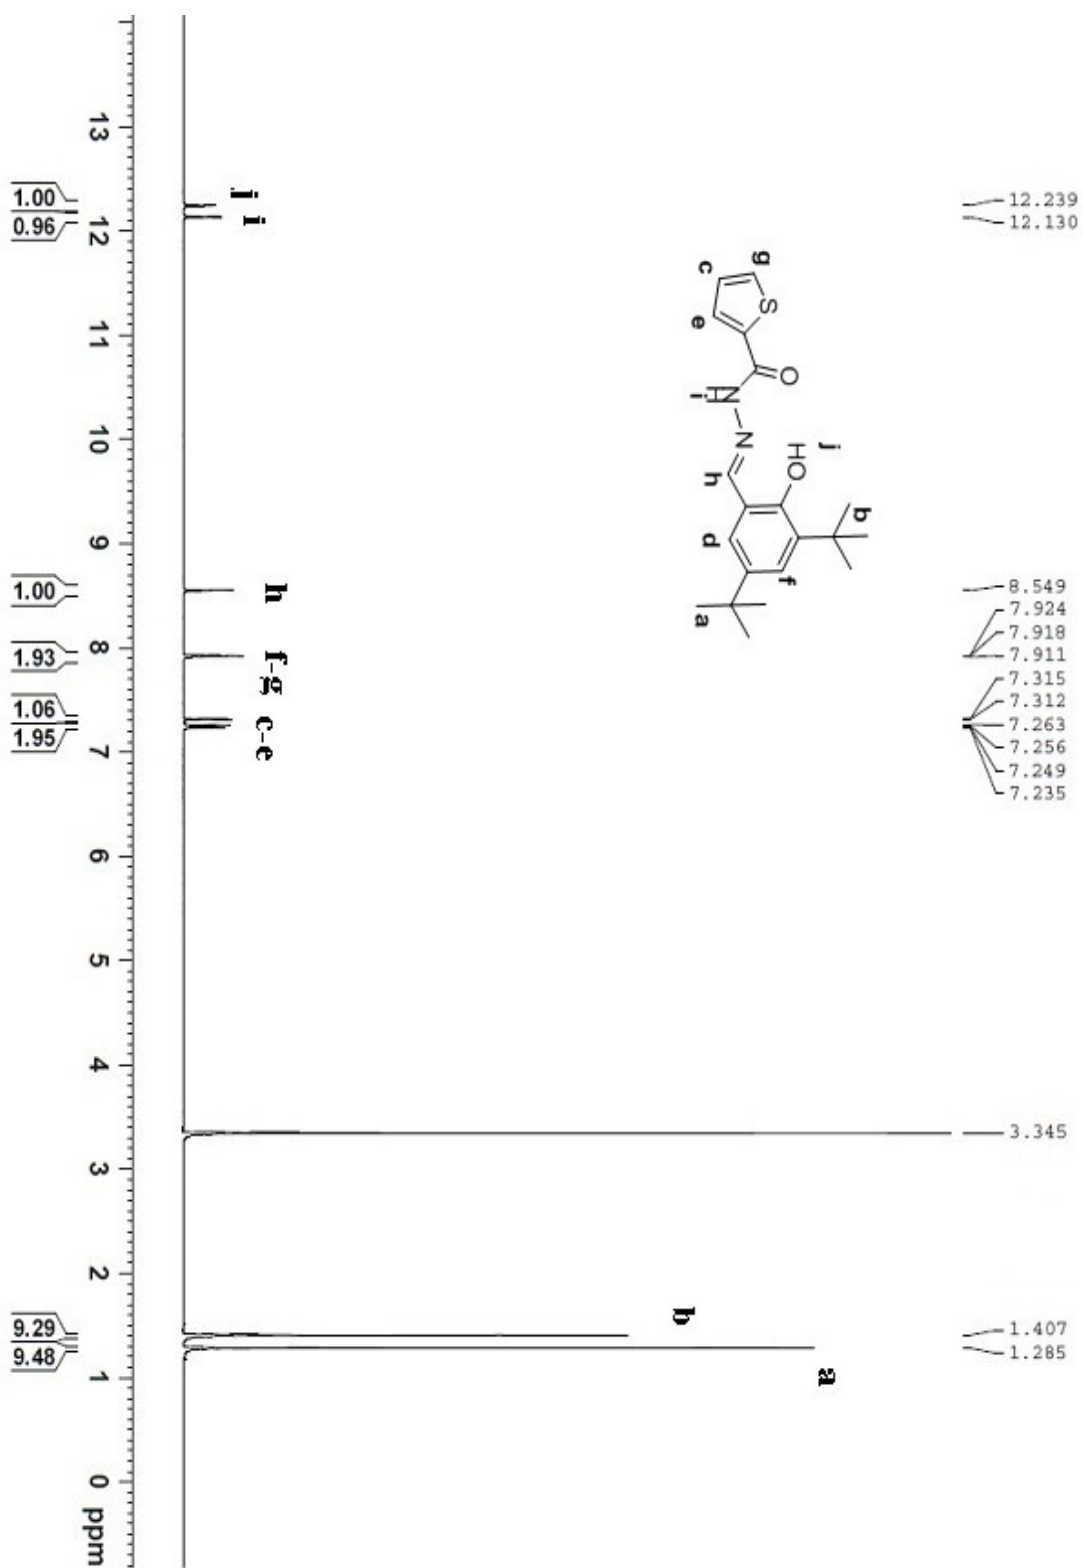

Fig. S1. <sup>1</sup>H NMR (400 MHz, DMSO-d<sub>6</sub>) of Compound **L1H<sub>2</sub>**

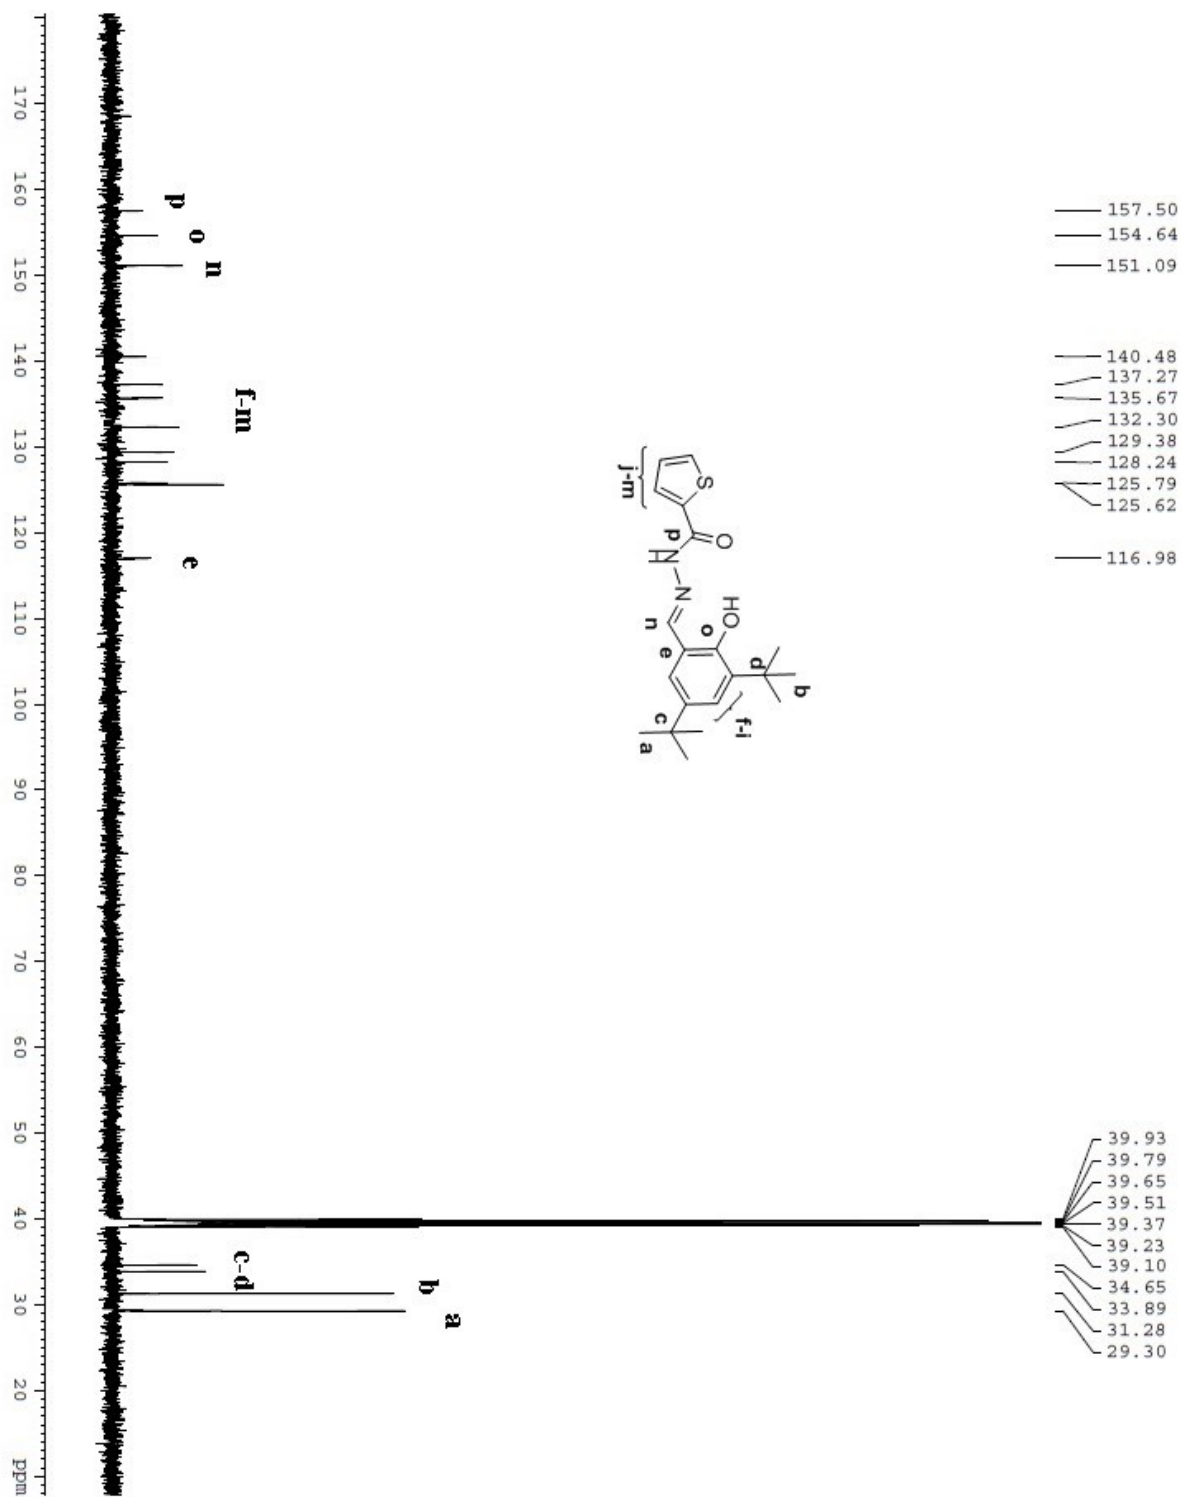

Fig. S2.  $^{13}\text{C}$  NMR (100 MHz, DMSO- $d_6$ ) of Compound L1H<sub>2</sub>

WATERS, Q-TOF MICROMASS (LC-MS)  
SAGNIK S1-Th 8 (0.212) Cm (5:9)

SAIF/CIL,PANJAB UNIVERSITY,CHANDIGARH  
TOF MS ES+  
2.34e4

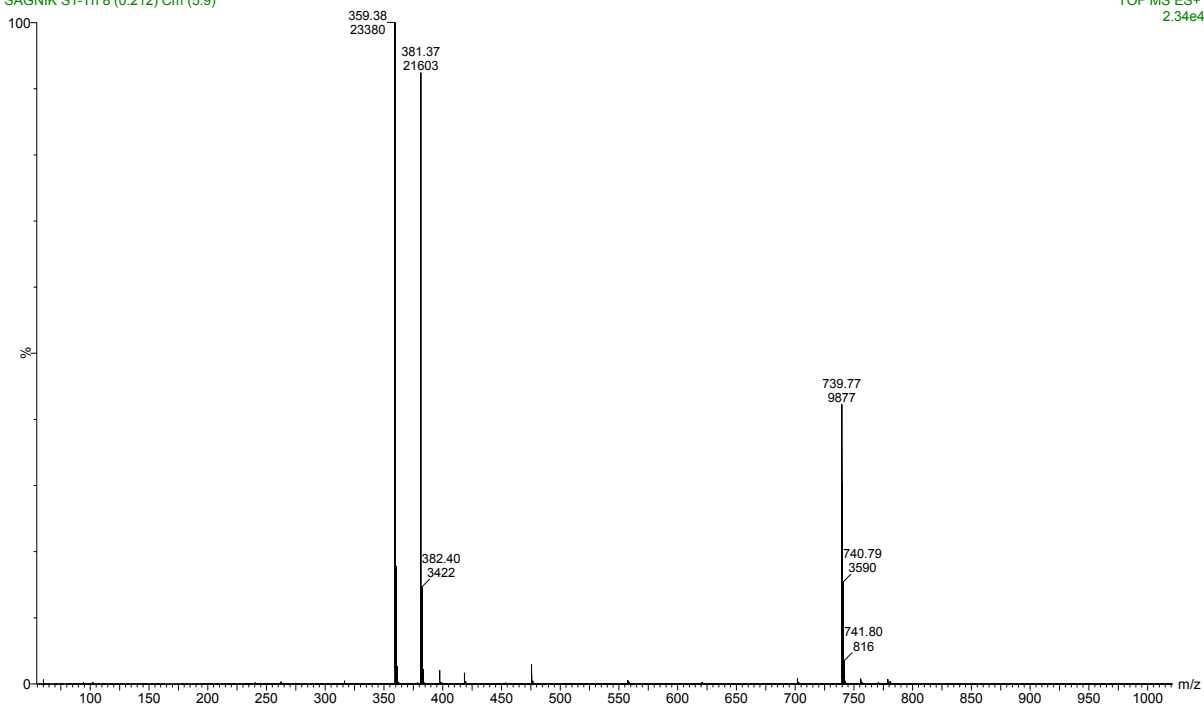

WATERS, Q-TOF MICROMASS (LC-MS)  
SAGNIK S1-Th 8 (0.212) Cm (5:9)

SAIF/CIL,PANJAB UNIVERSITY,CHANDIGARH  
TOF MS ES+  
2.34e4

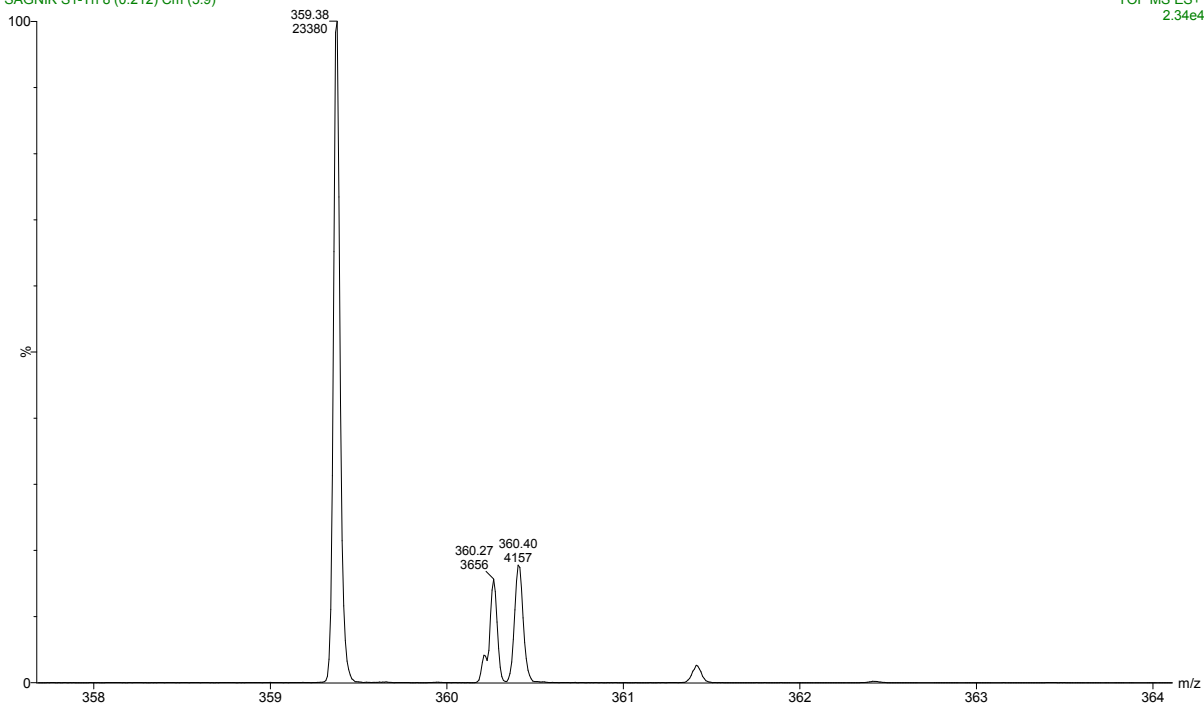

Fig. S3. ESI mass spectrum of Compound L1H<sub>2</sub>

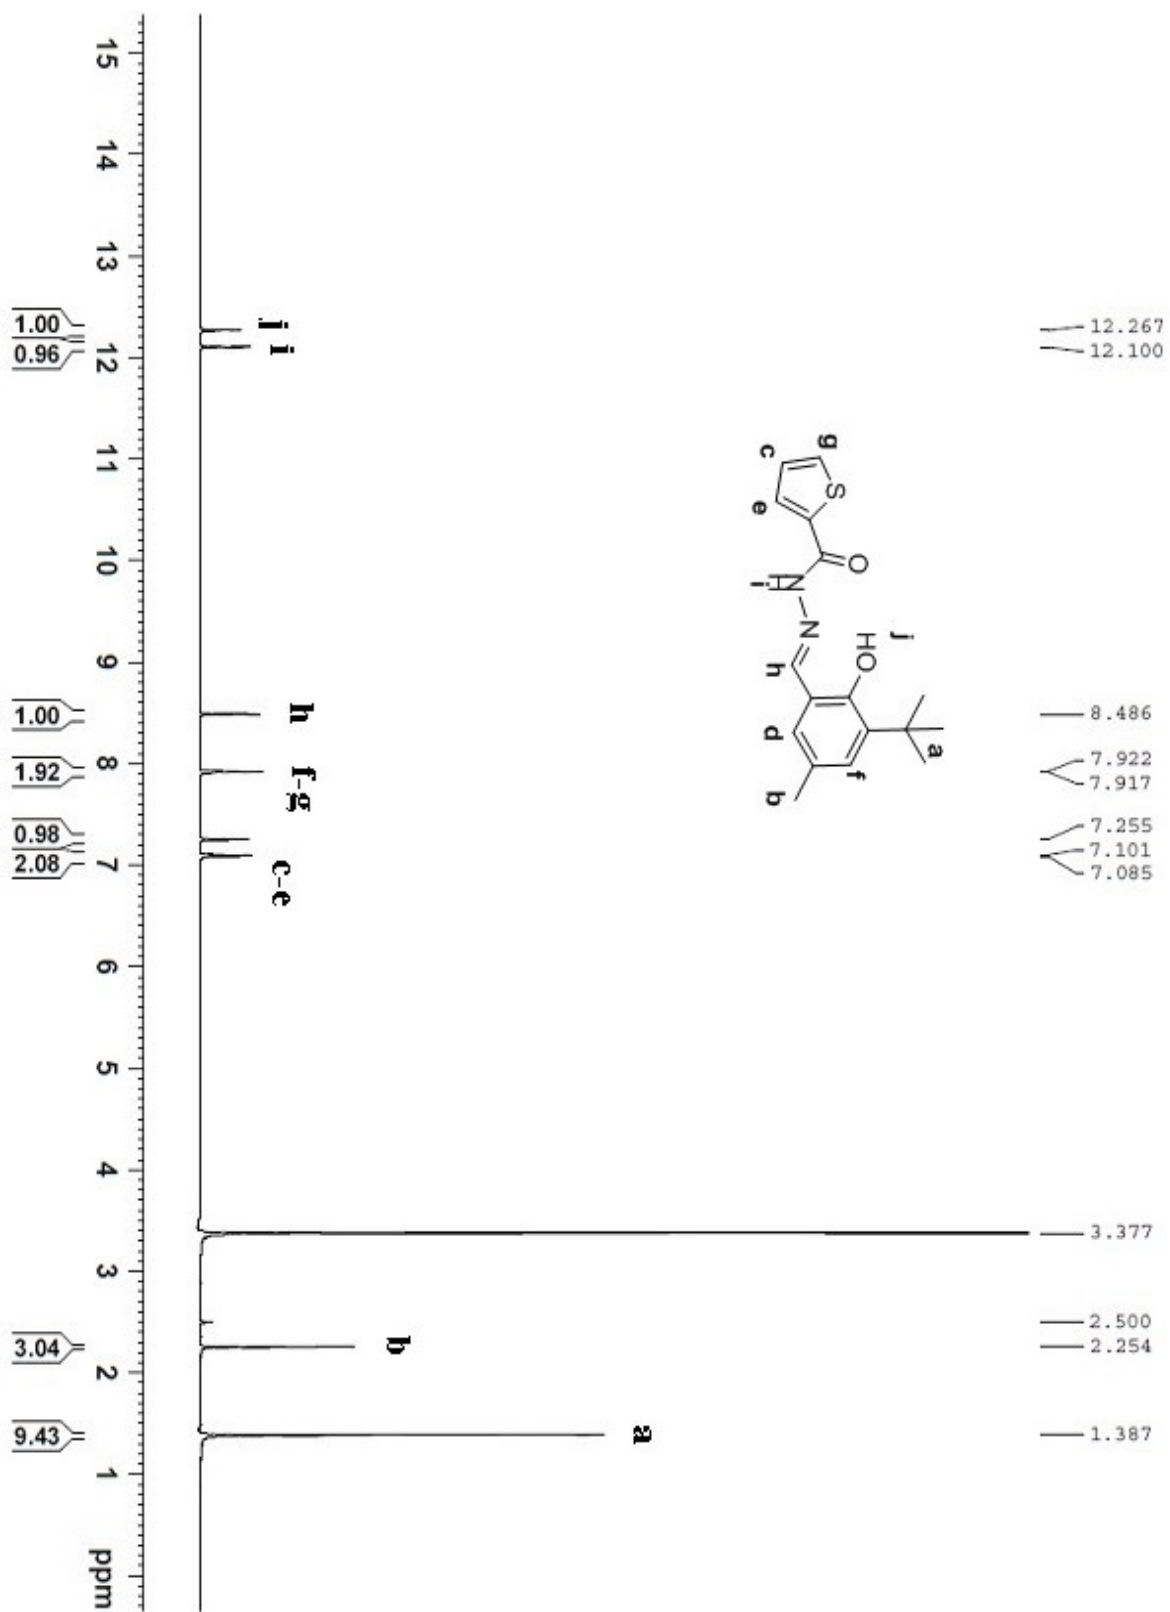

Fig. S4. <sup>1</sup>H NMR (400 MHz, DMSO-d<sub>6</sub>) of Compound **L2H<sub>2</sub>**

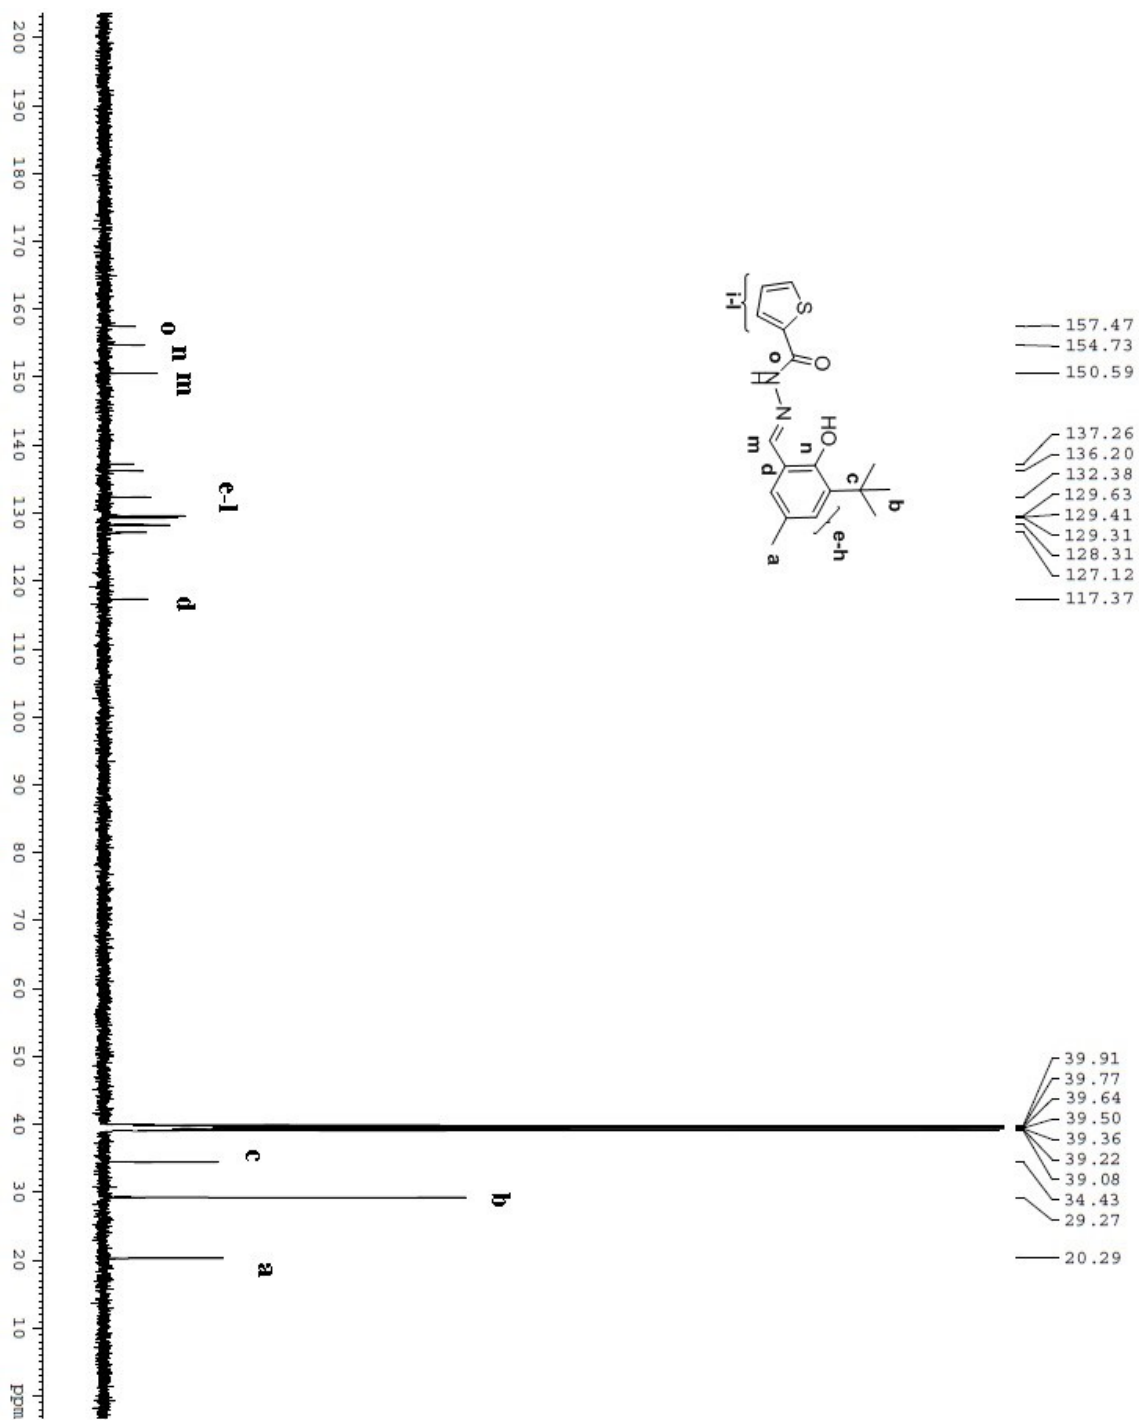

Fig. S5.  $^{13}\text{C}$  NMR (100 MHz, DMSO- $d_6$ ) of Compound L2H<sub>2</sub>

WATERS, Q-TOF MICROMASS (LC-MS)  
SAGNIK S2-Th 6 (0.159) Cm (5:11-16:40)

SAIF/CIL,PANJAB UNIVERSITY,CHANDIGARH  
TOF MS ES+  
2.32e4

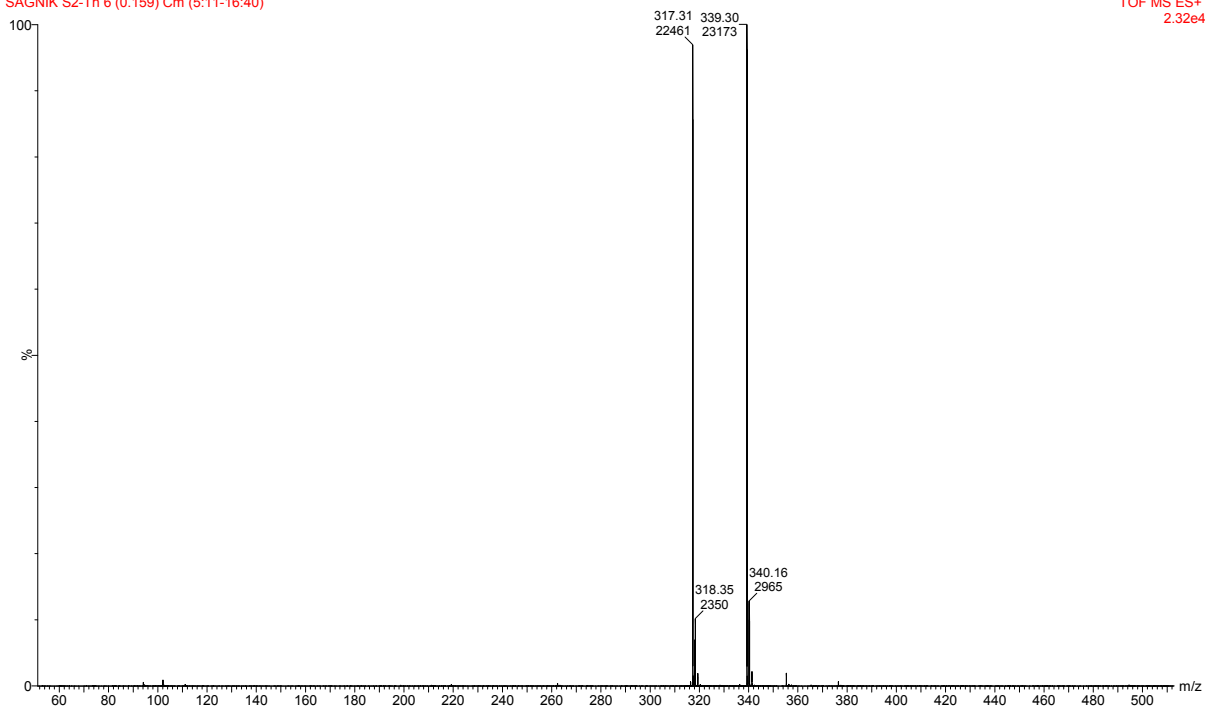

WATERS, Q-TOF MICROMASS (LC-MS)  
SAGNIK S2-Th 6 (0.159) Cm (5:11-16:40)

SAIF/CIL,PANJAB UNIVERSITY,CHANDIGARH  
TOF MS ES+  
2.25e4

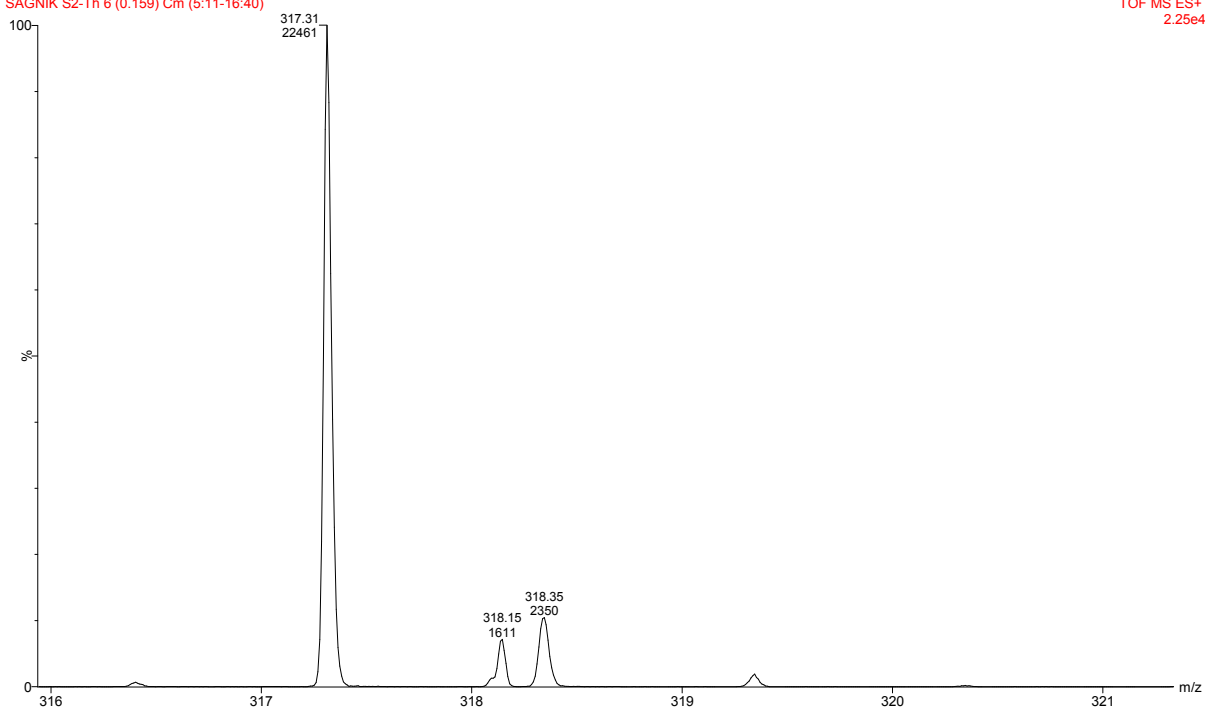

**Fig. S6.** ESI mass spectrum of Compound L2H<sub>2</sub>

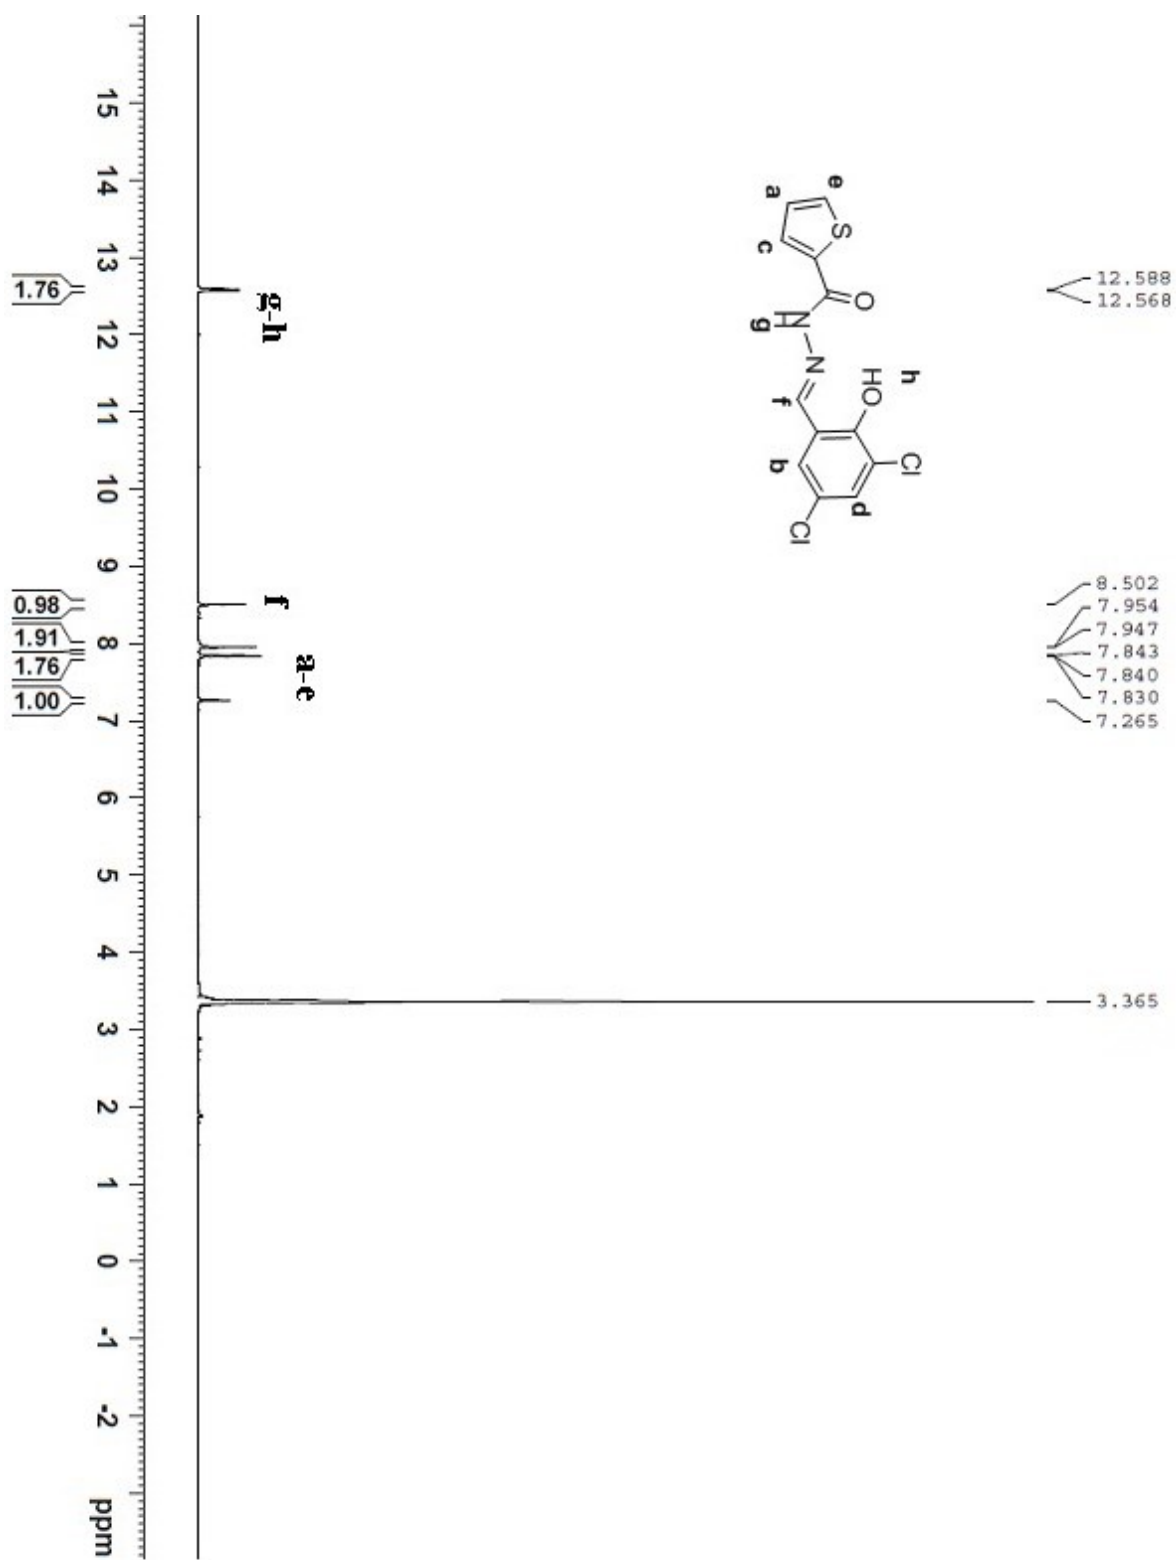

Fig. S7. <sup>1</sup>H NMR (400 MHz, DMSO-d<sub>6</sub>) of Compound **L3H<sub>2</sub>**



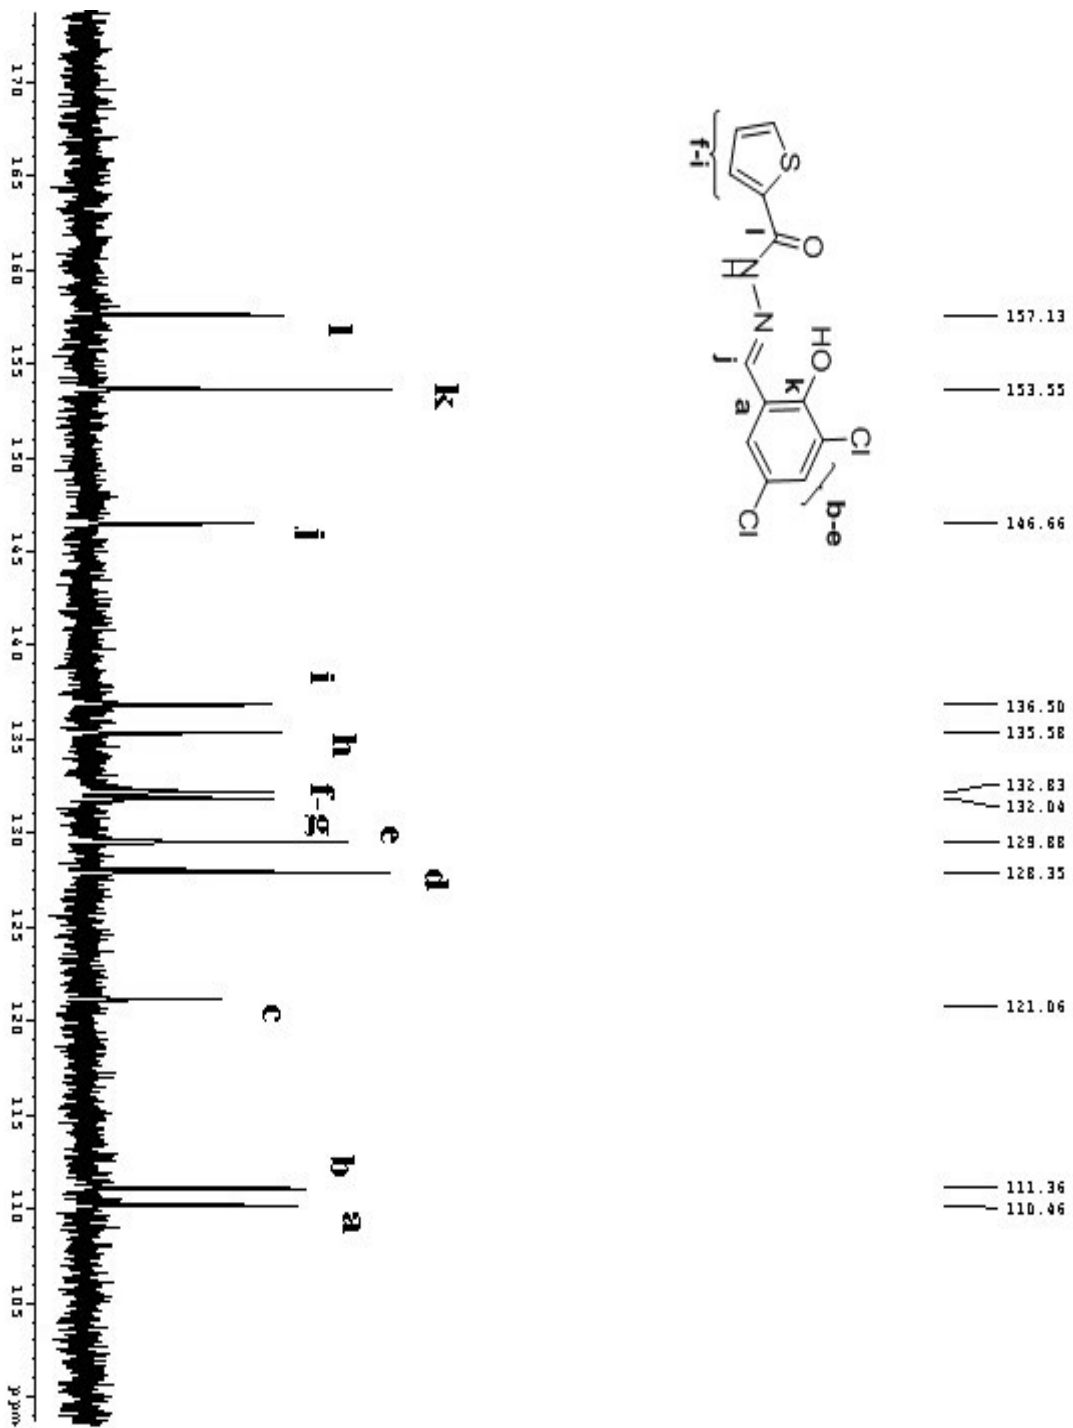

Fig. S8.  $^{13}\text{C}$  NMR (100 MHz, DMSO- $d_6$ ) of Compound L3H<sub>2</sub>

WATERS, Q-TOF MICROMASS (LC-MS)  
SAGNIK S3-Th 6 (0.160) Cm (5:9-17:33)

SAIF/CIL,PANJAB UNIVERSITY,CHANDIGARH  
TOF MS ES+  
1.93e3

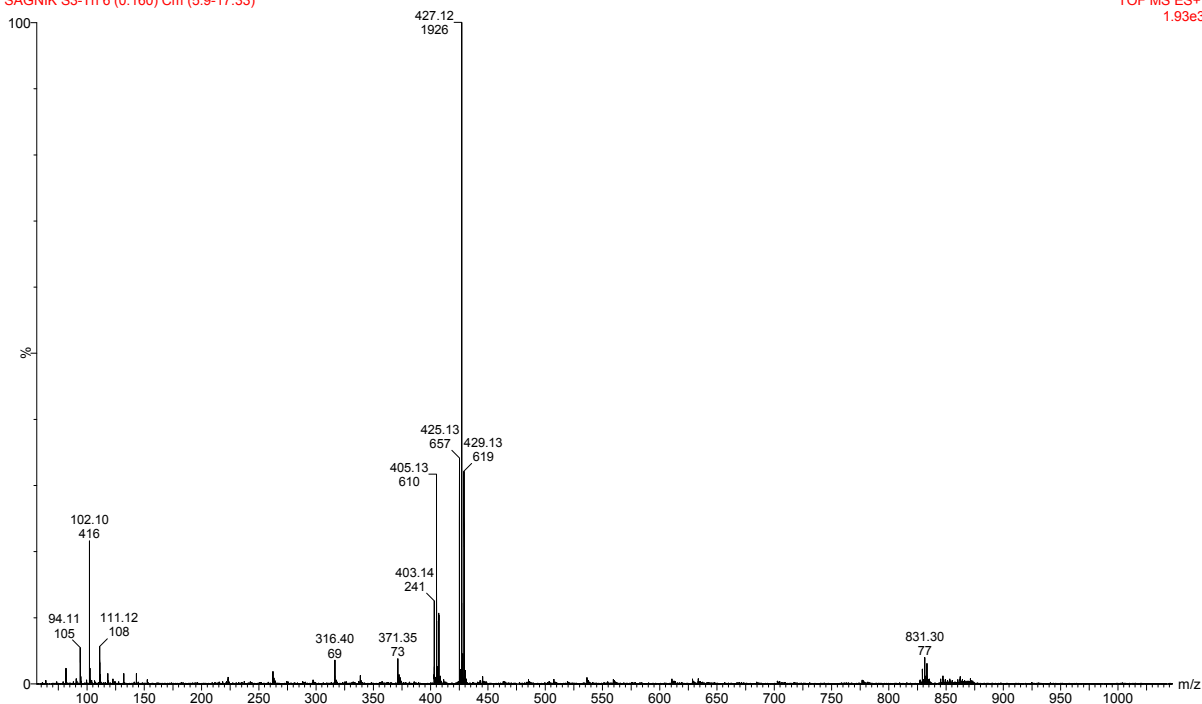

WATERS, Q-TOF MICROMASS (LC-MS)  
SAGNIK S3-Th 6 (0.160) Cm (5:9-17:33)

SAIF/CIL,PANJAB UNIVERSITY,CHANDIGARH  
TOF MS ES+  
1.93e3

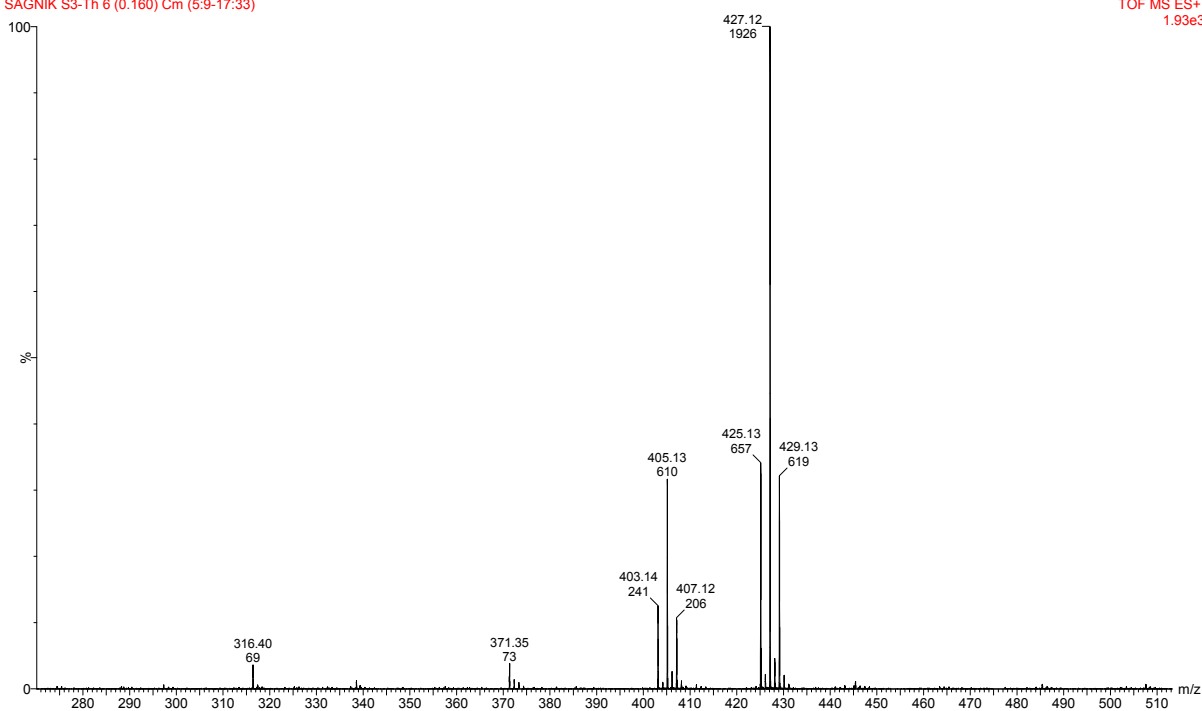

Fig. S9. ESI mass spectrum of Compound L3H<sub>2</sub>

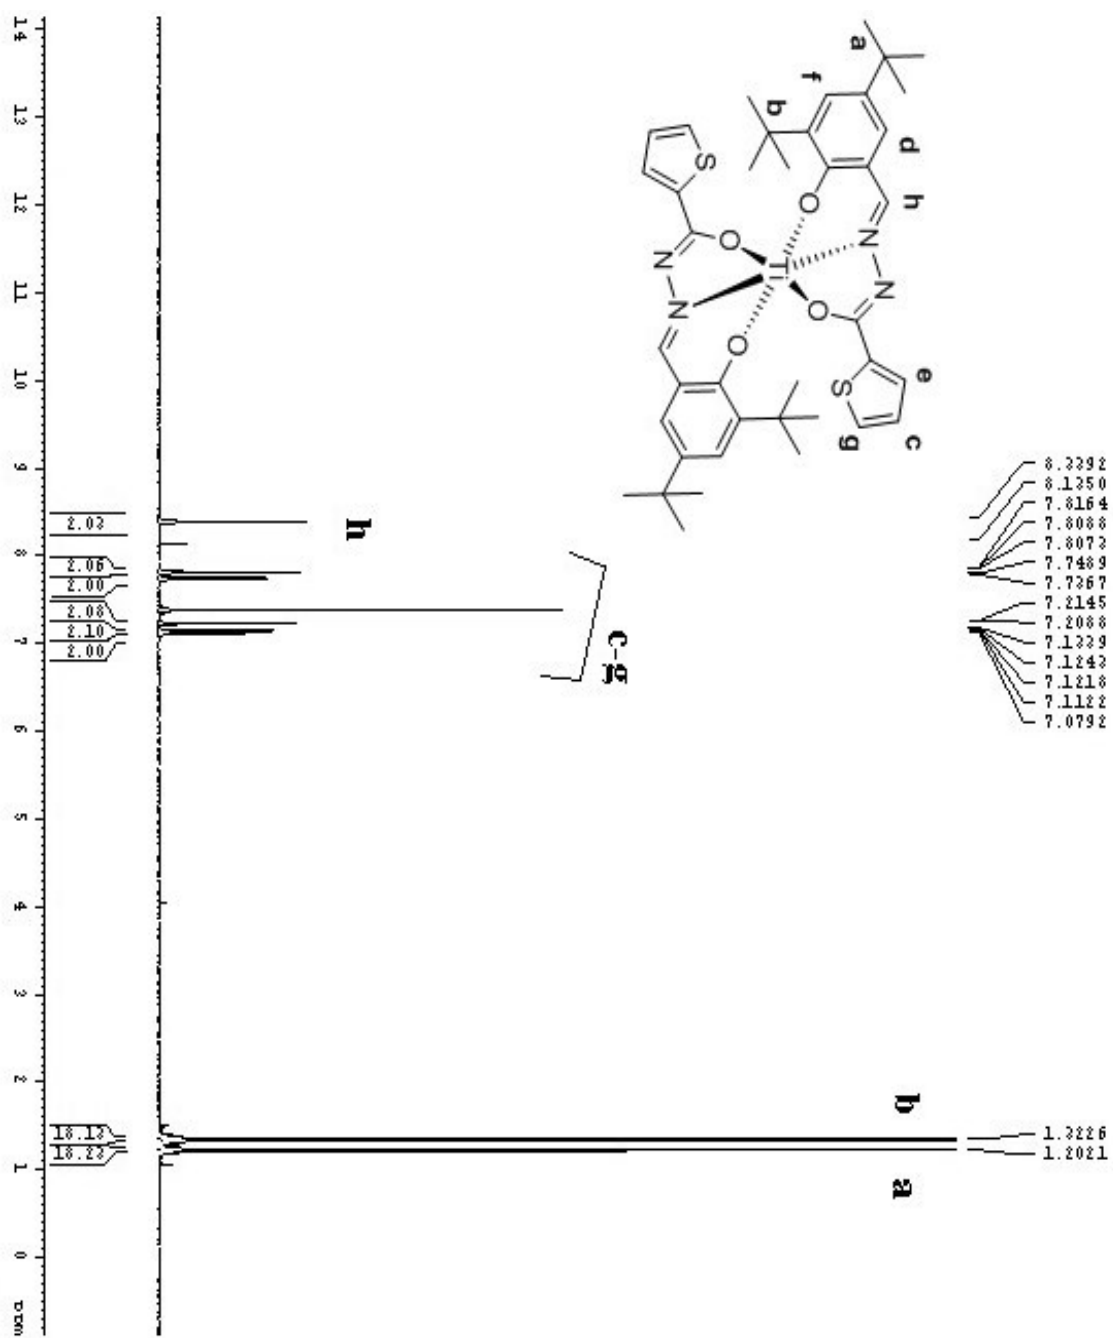

Fig. S10.  $^1\text{H}$  NMR (400 MHz,  $\text{CDCl}_3$ ) of Compound 1

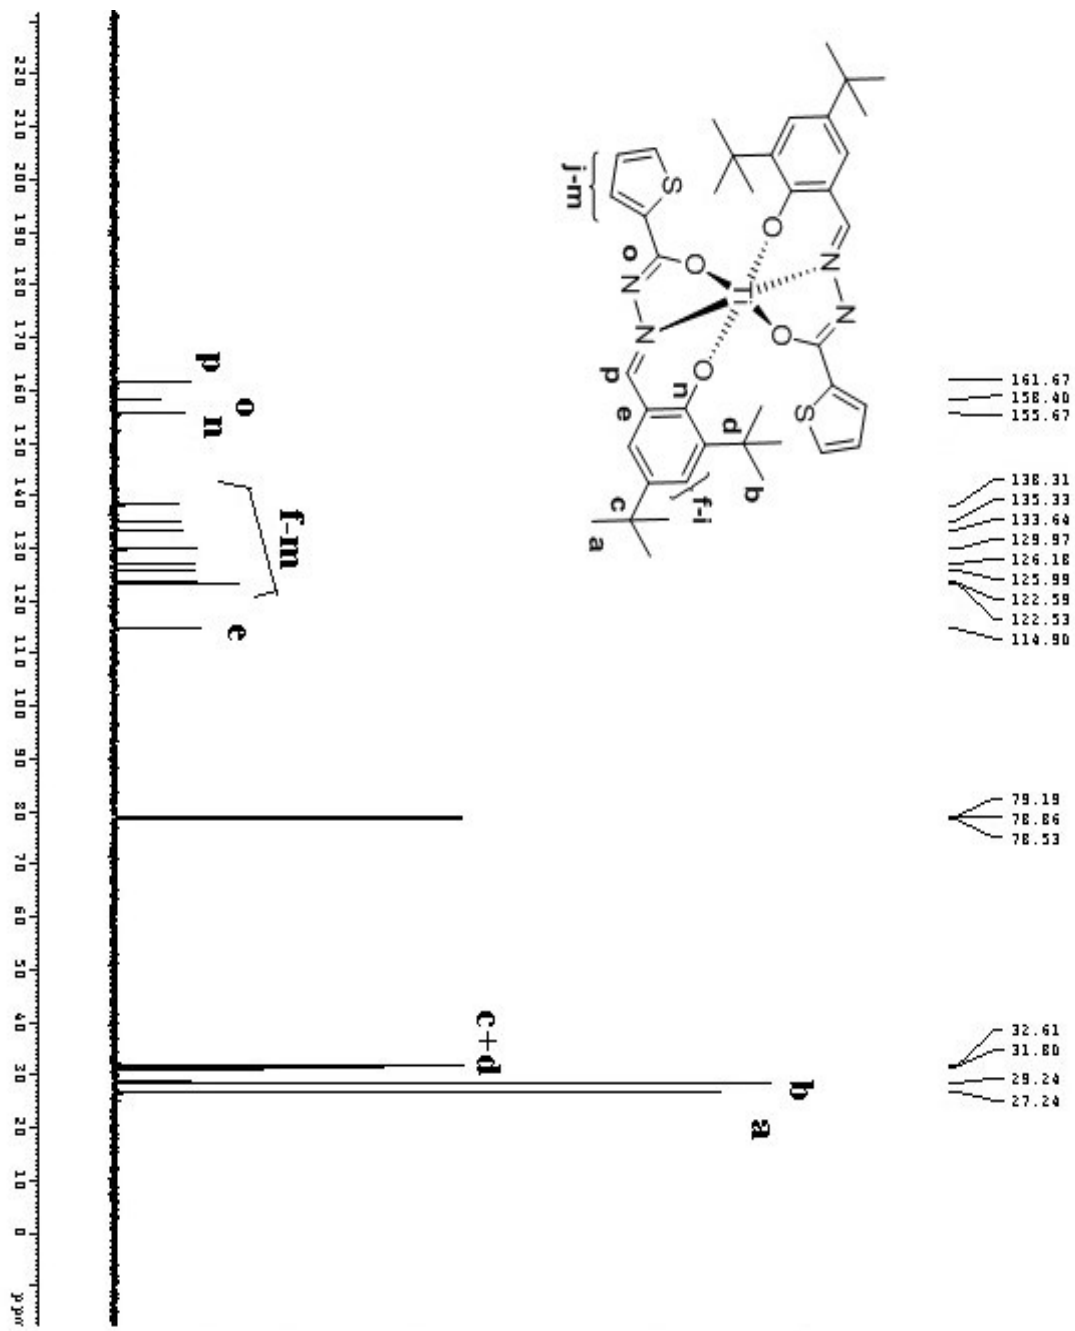

Fig. S11.  $^{13}\text{C}$  NMR (100 MHz,  $\text{CDCl}_3$ ) of Compound 1

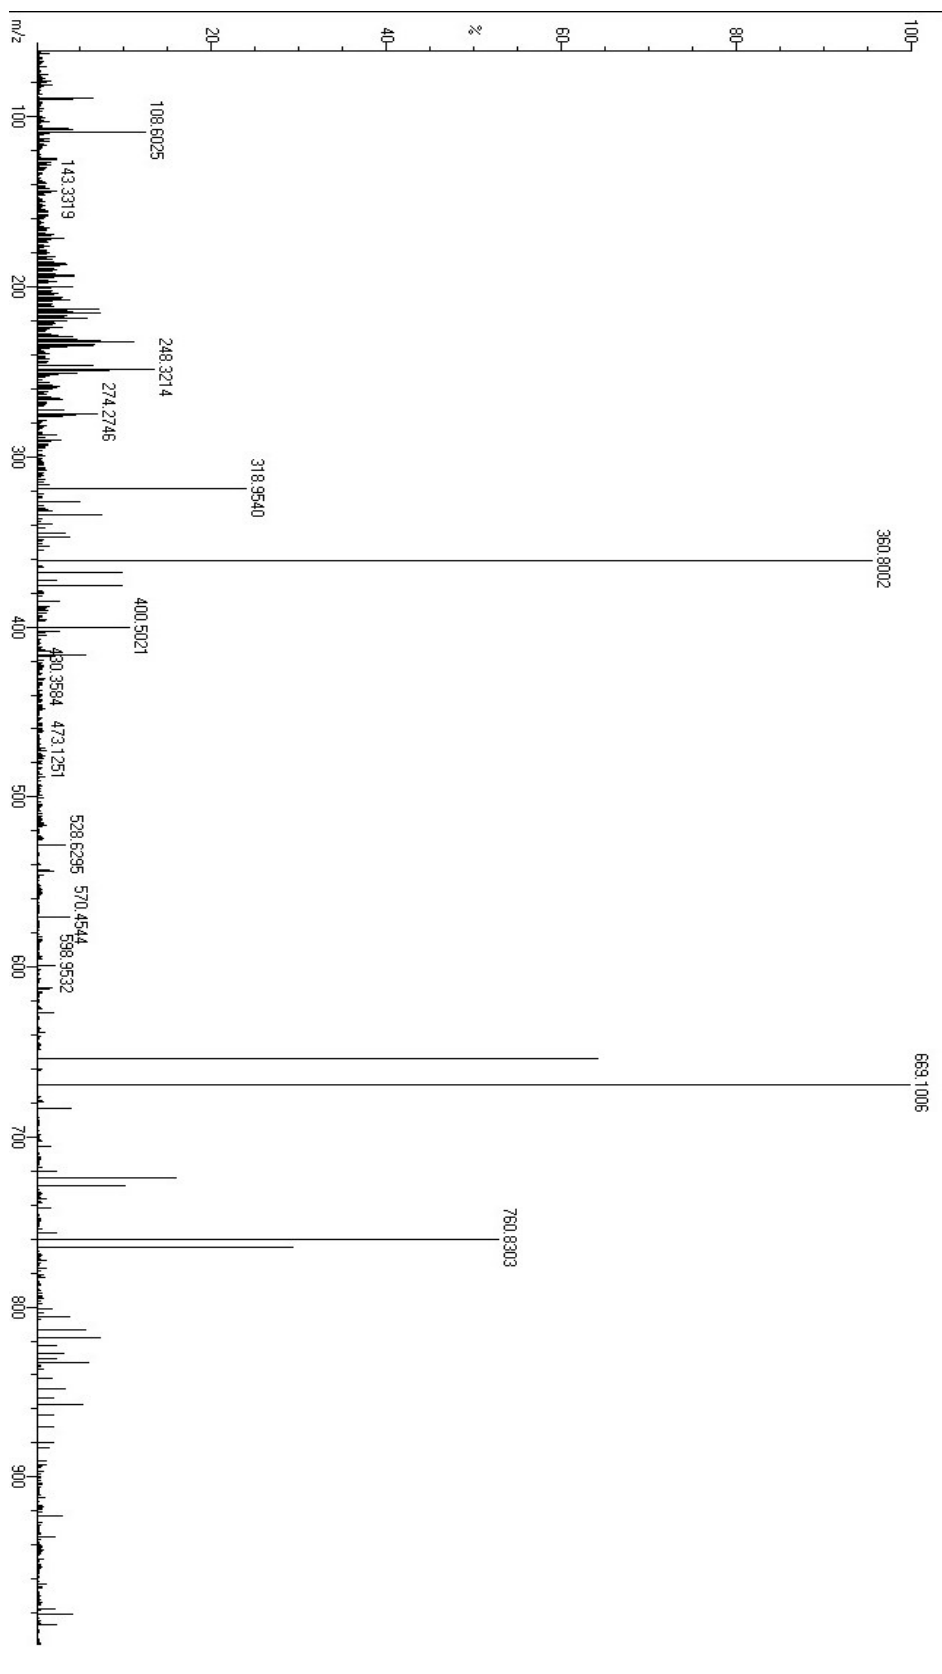

**Fig. S12.** ESI mass spectrum of Compound 1

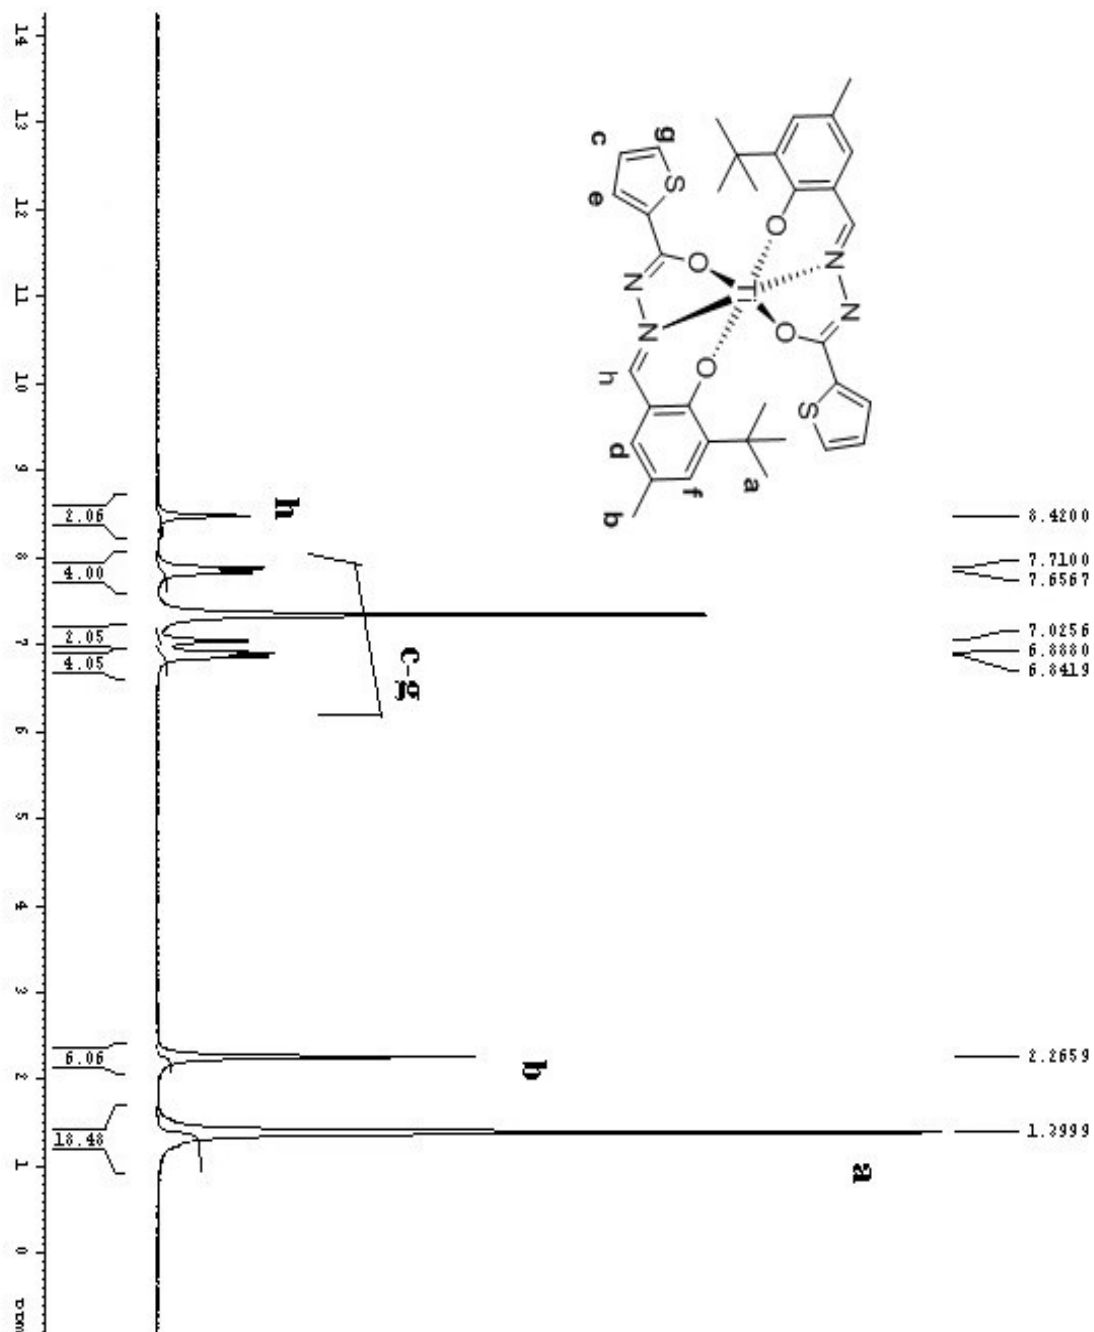

Fig. S13. <sup>1</sup>H NMR (400 MHz, CDCl<sub>3</sub>) of Compound 2

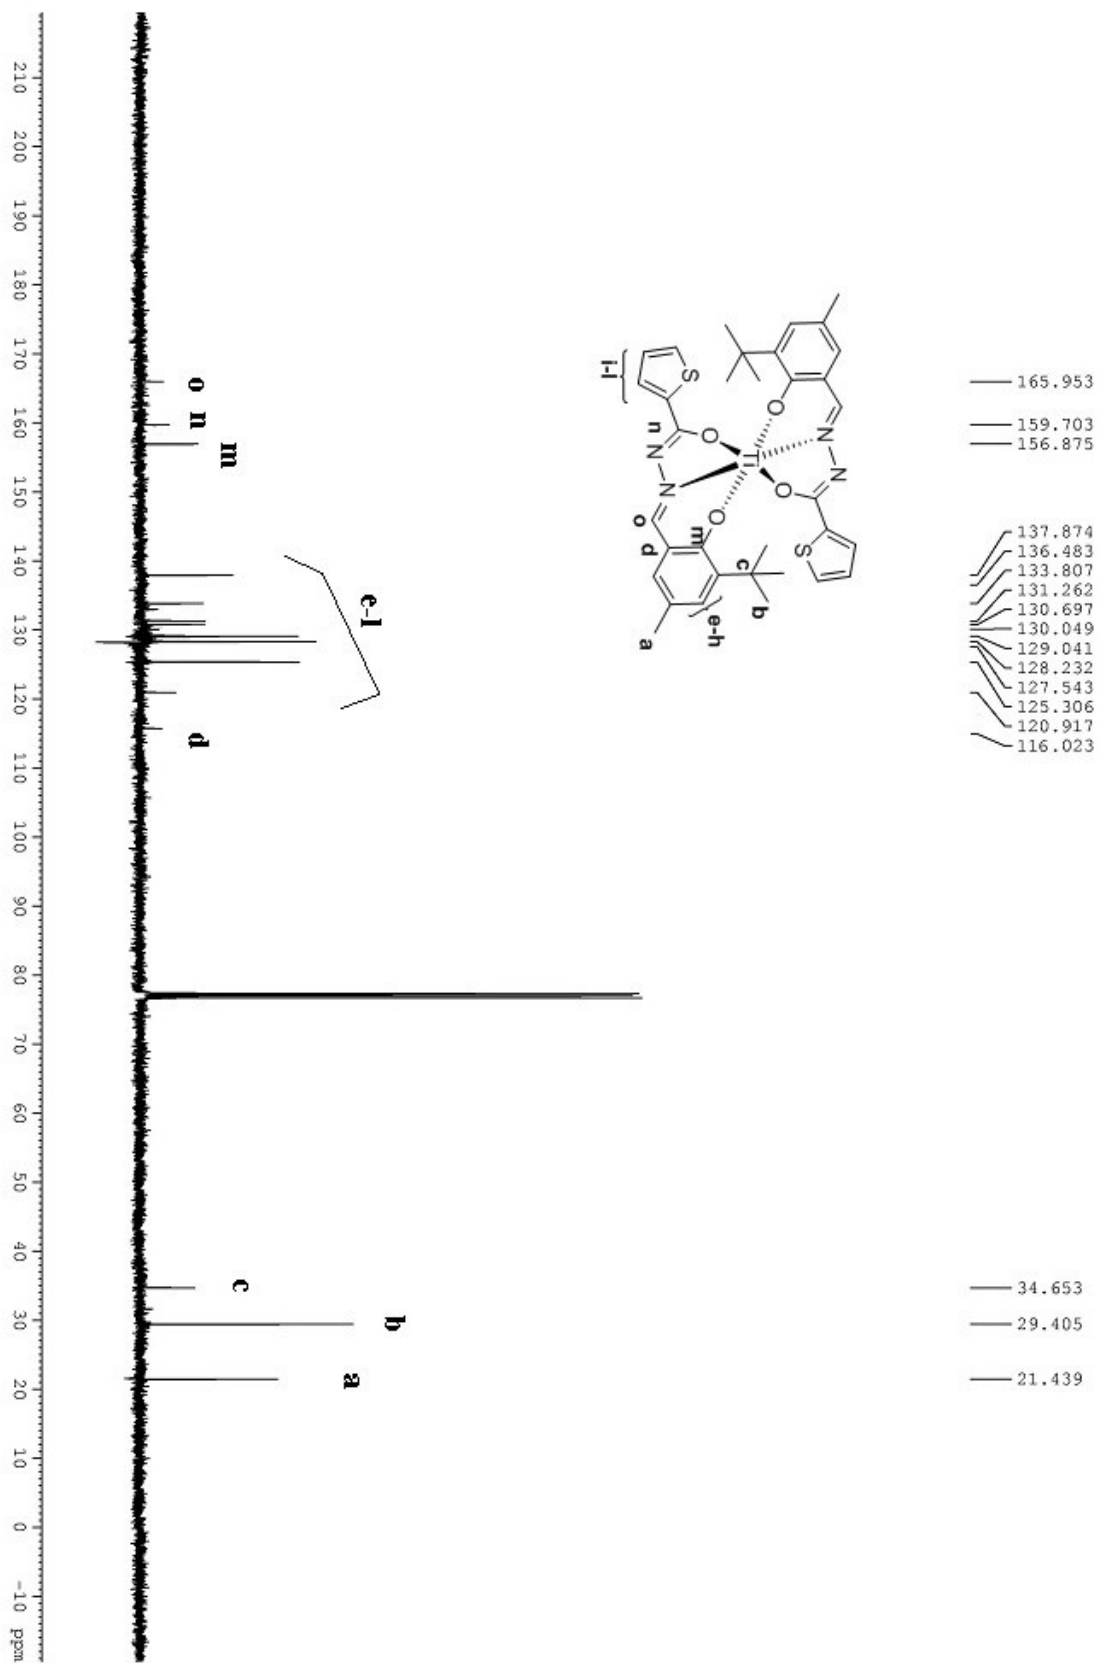

Fig. S14. <sup>13</sup>C NMR (100 MHz, CDCl<sub>3</sub>) of Compound 2

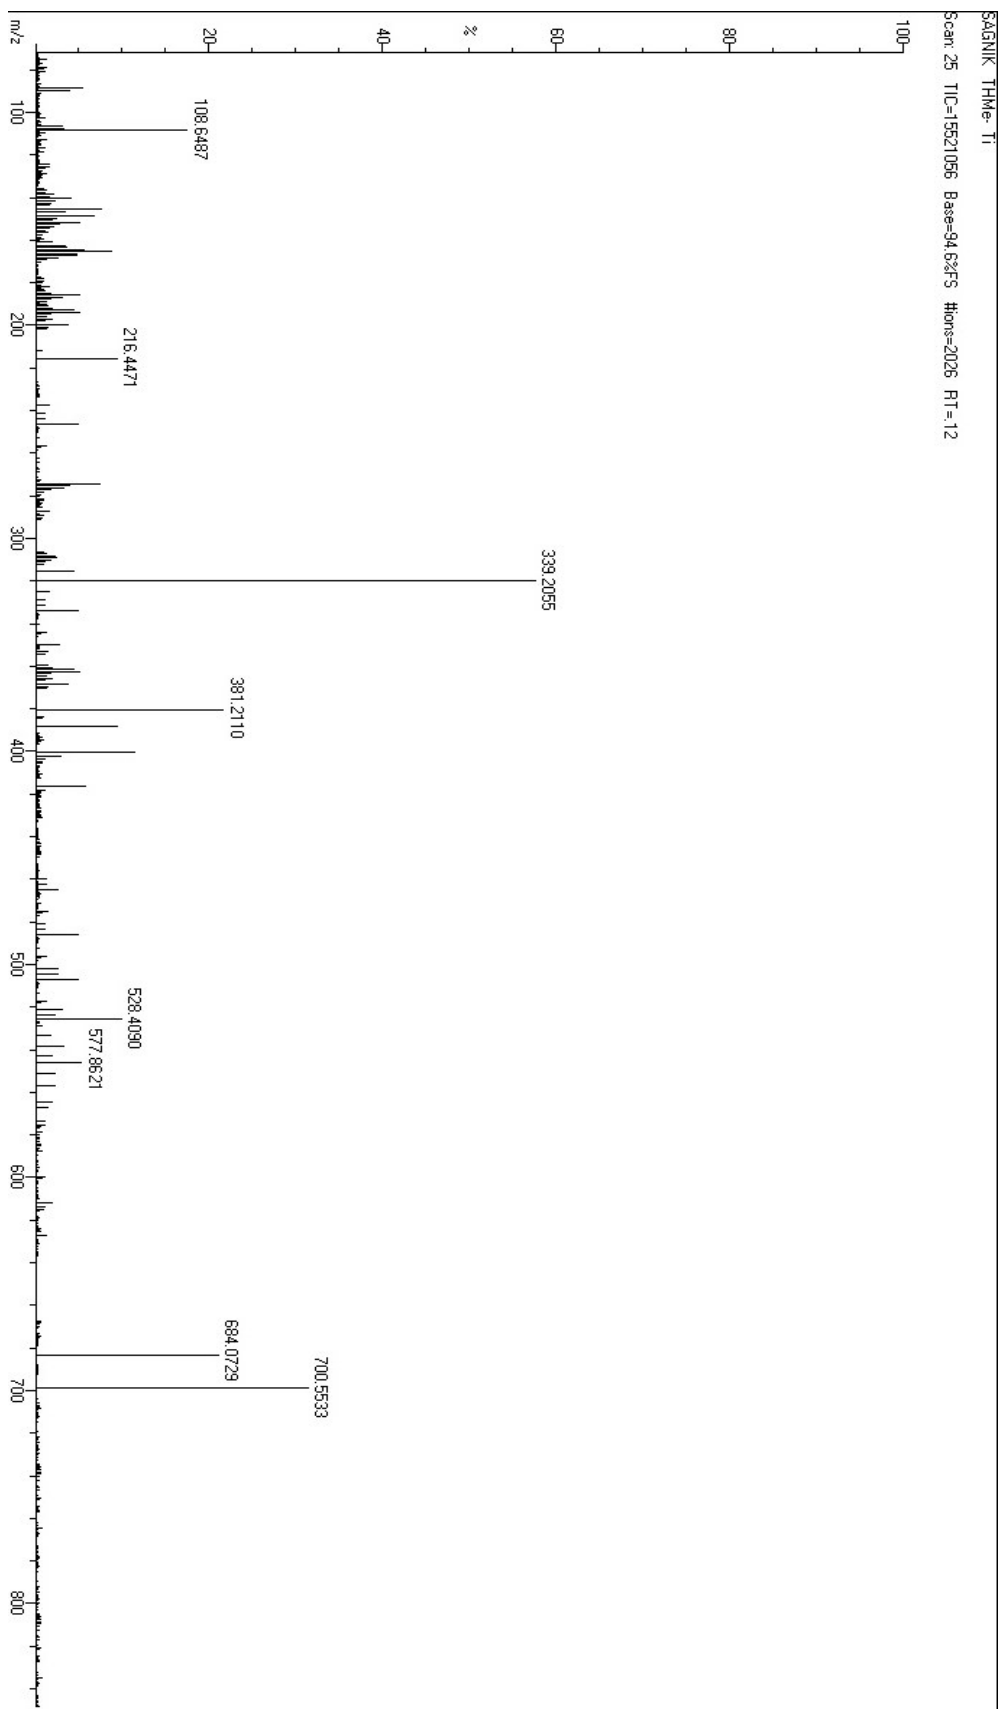

**Fig. S15.** ESI mass spectrum of Compound 2



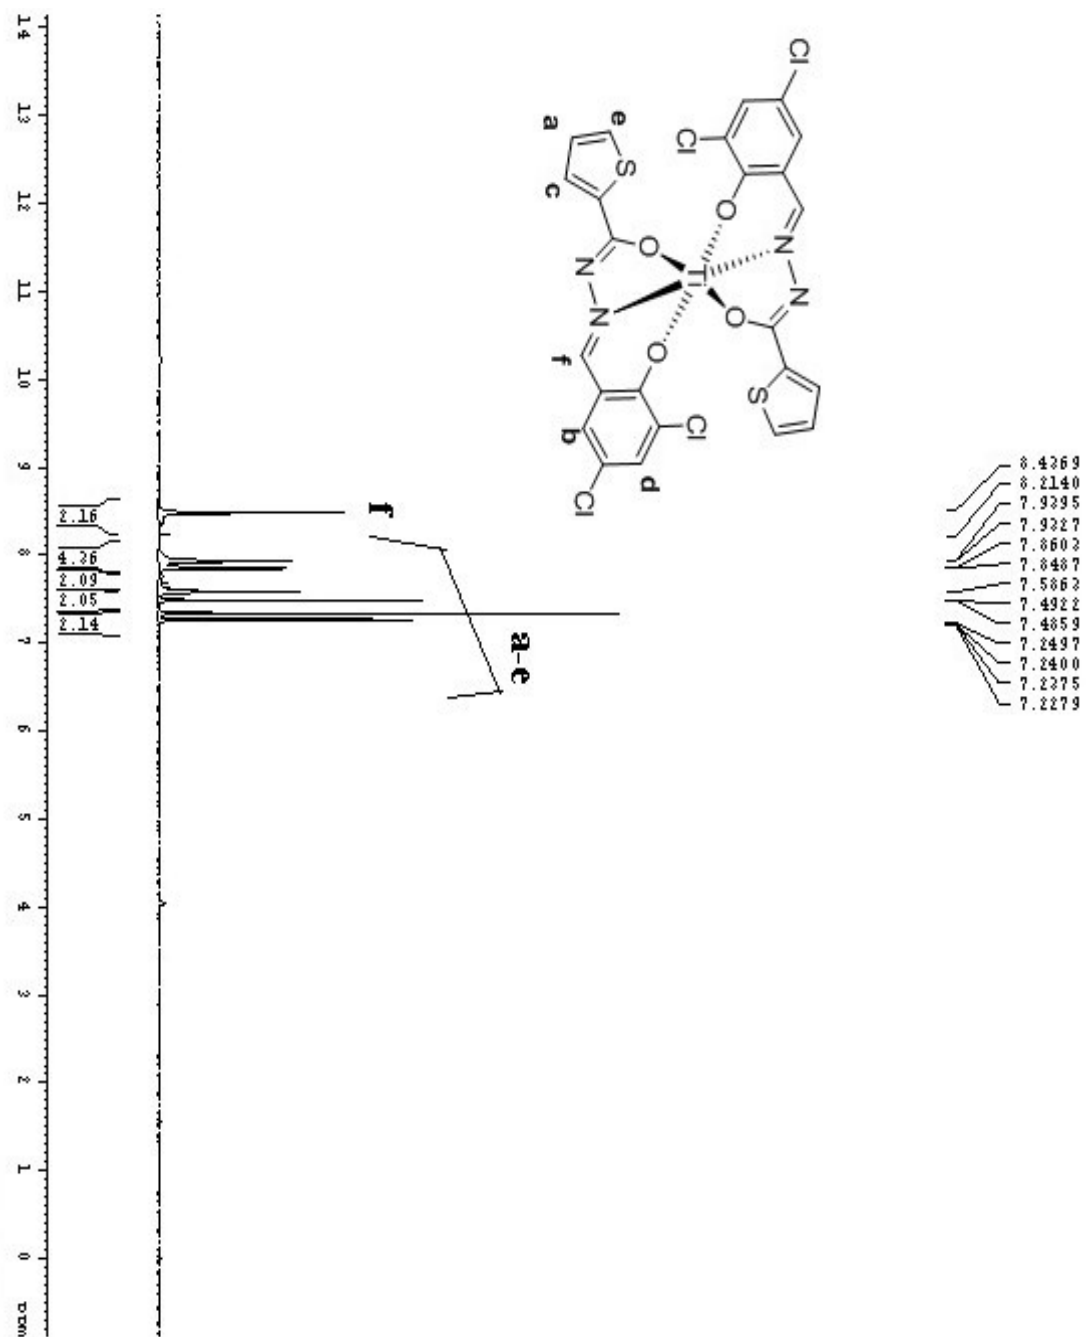

**Fig. S16.** <sup>1</sup>H NMR (400 MHz, CDCl<sub>3</sub>) of Compound 3

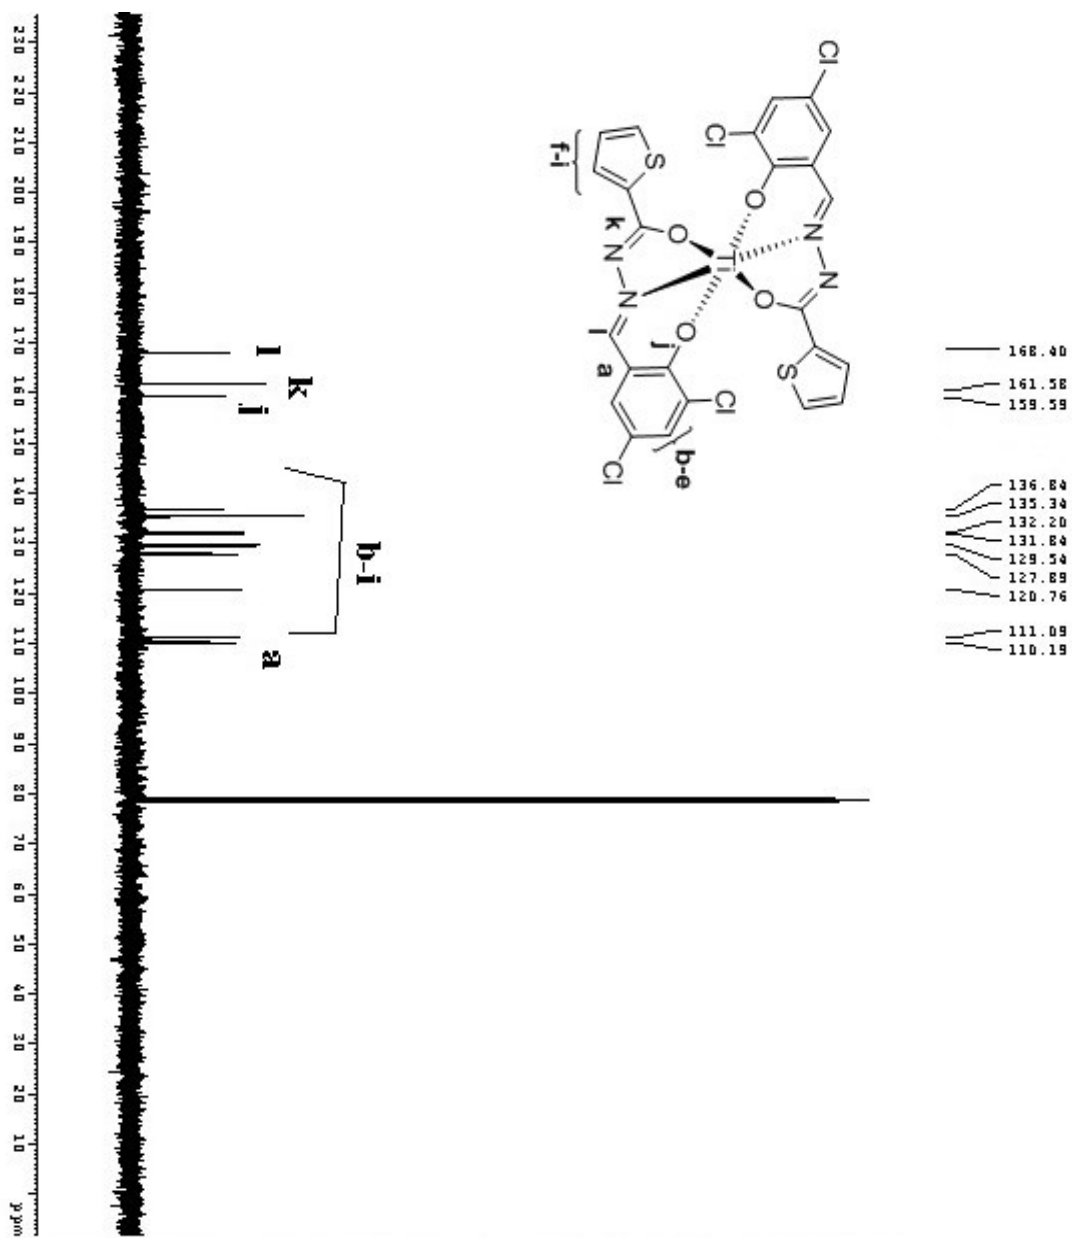

Fig. S17. <sup>13</sup>C NMR (100 MHz, CDCl<sub>3</sub>) of Compound 3

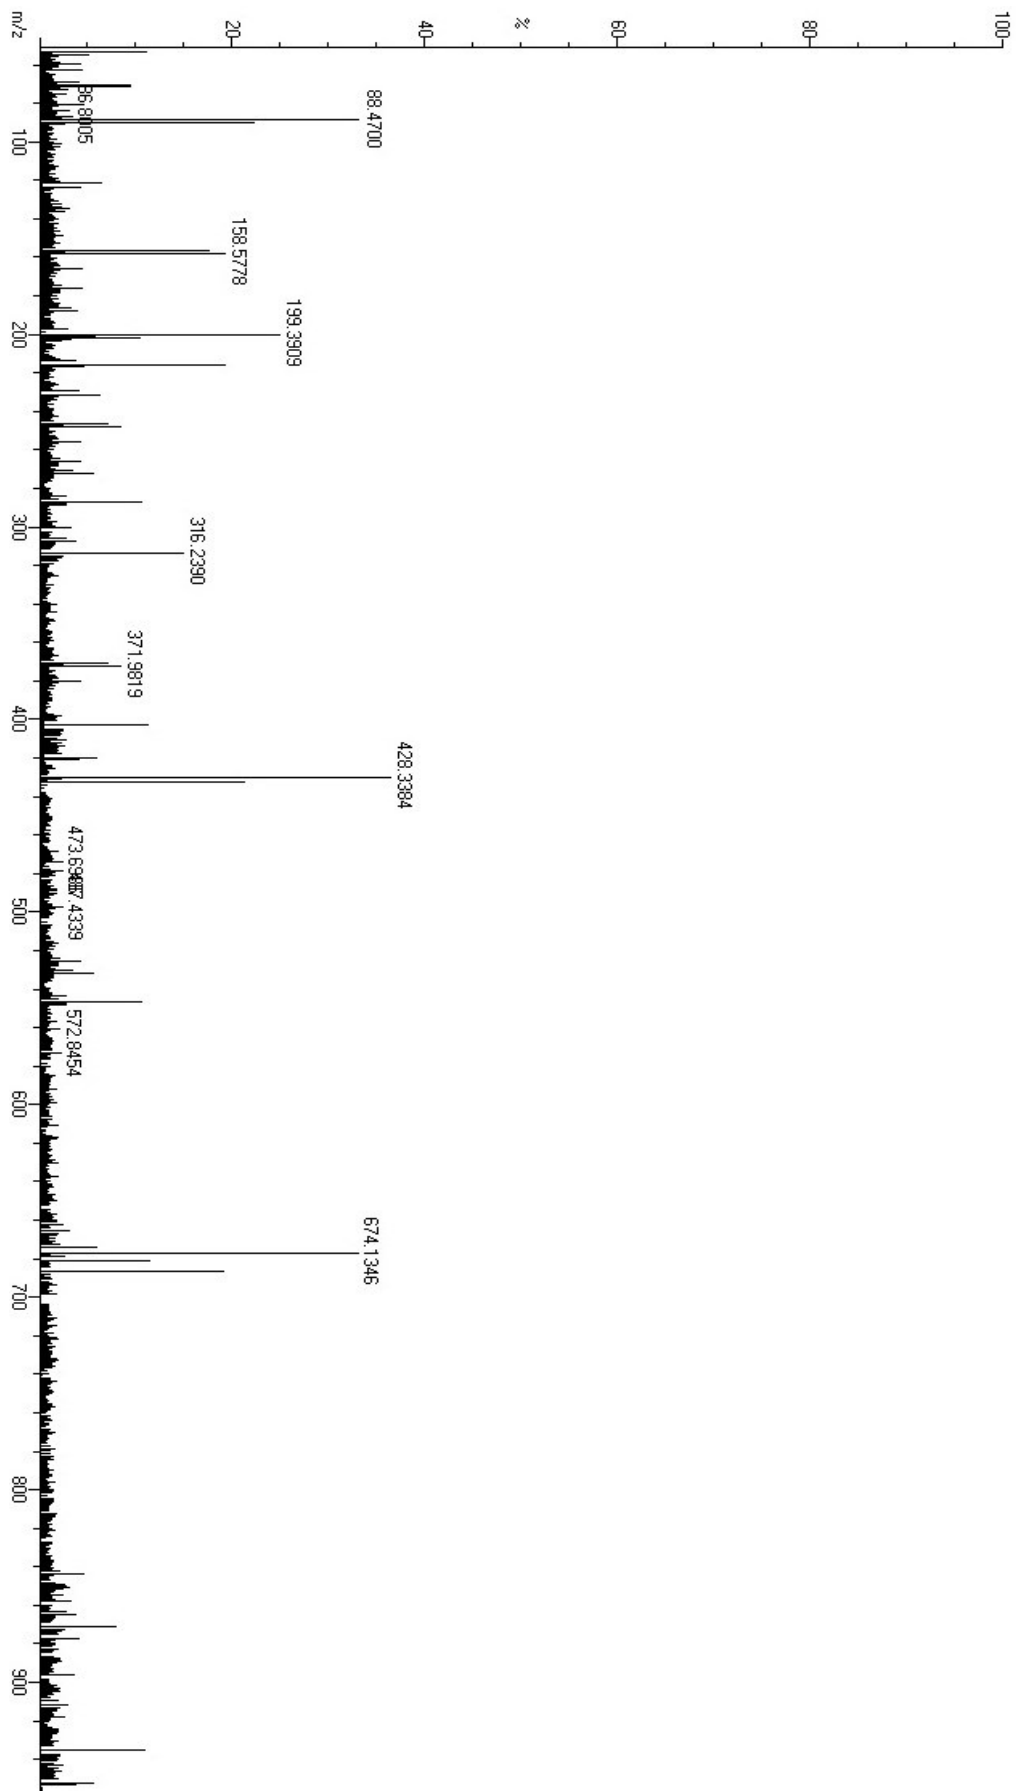

**Fig. S18.** ESI mass spectrum of Compound 3

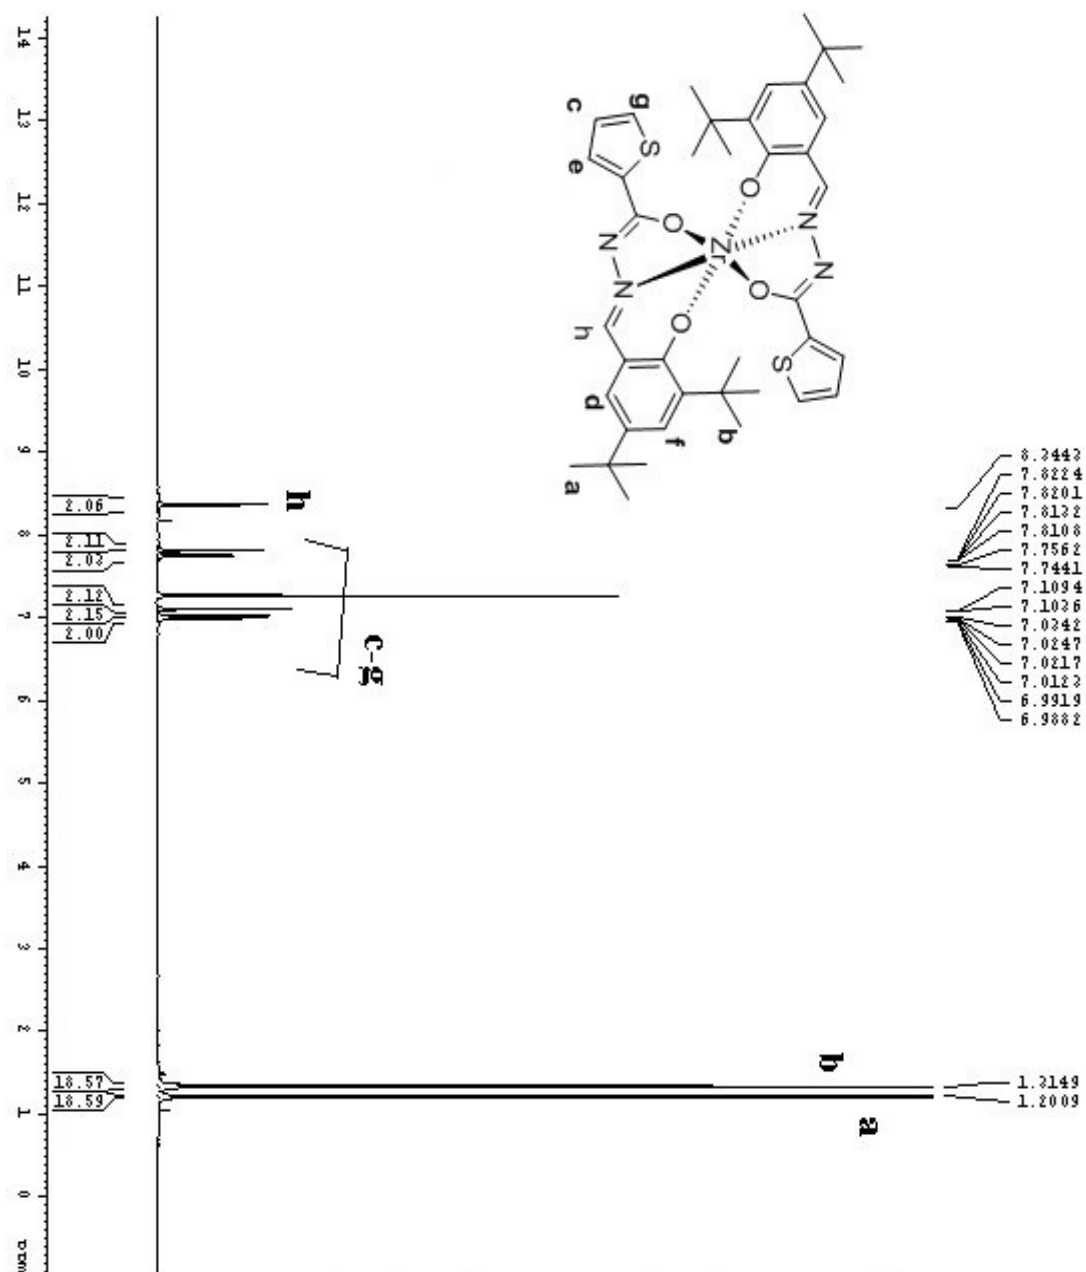

Fig. S19. <sup>1</sup>H NMR (400 MHz, CDCl<sub>3</sub>) of Compound 4

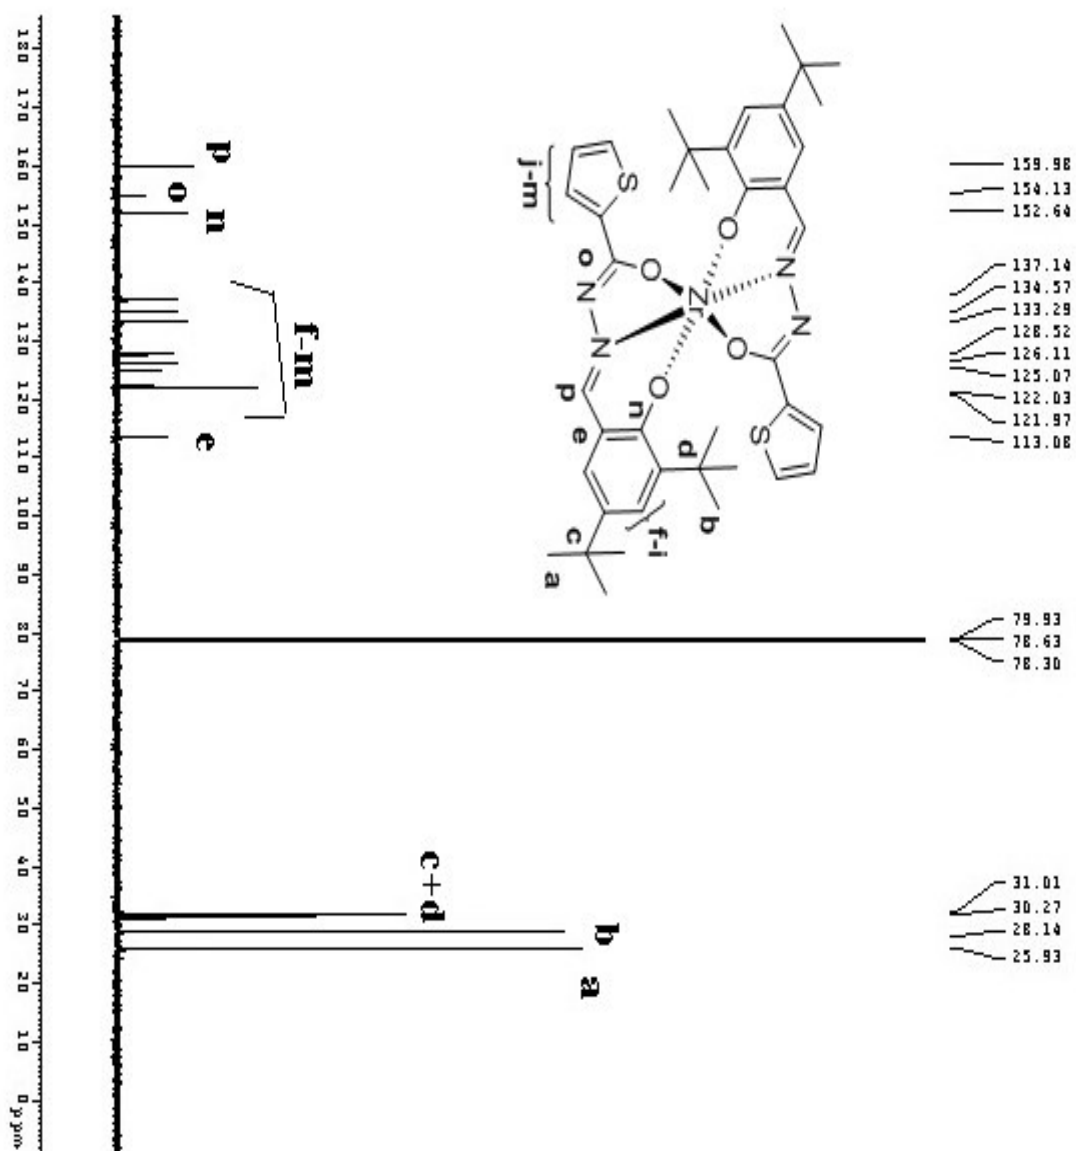

Fig. S20. <sup>13</sup>C NMR (100 MHz, CDCl<sub>3</sub>) of Compound 4

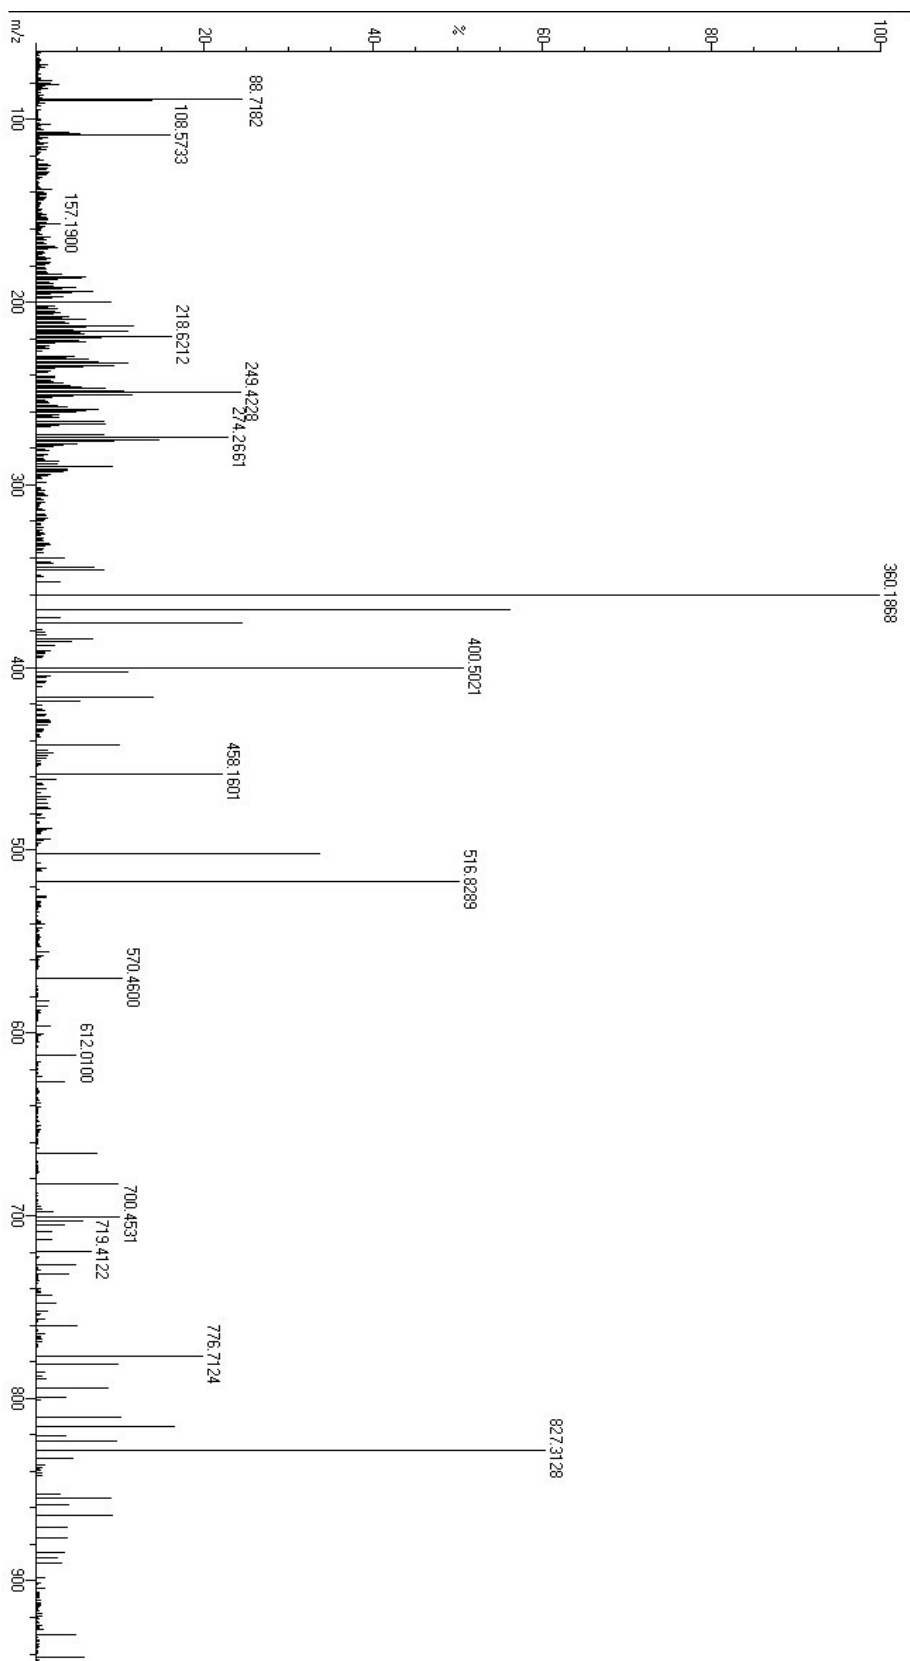

**Fig. S21.** ESI mass spectrum of Compound 4

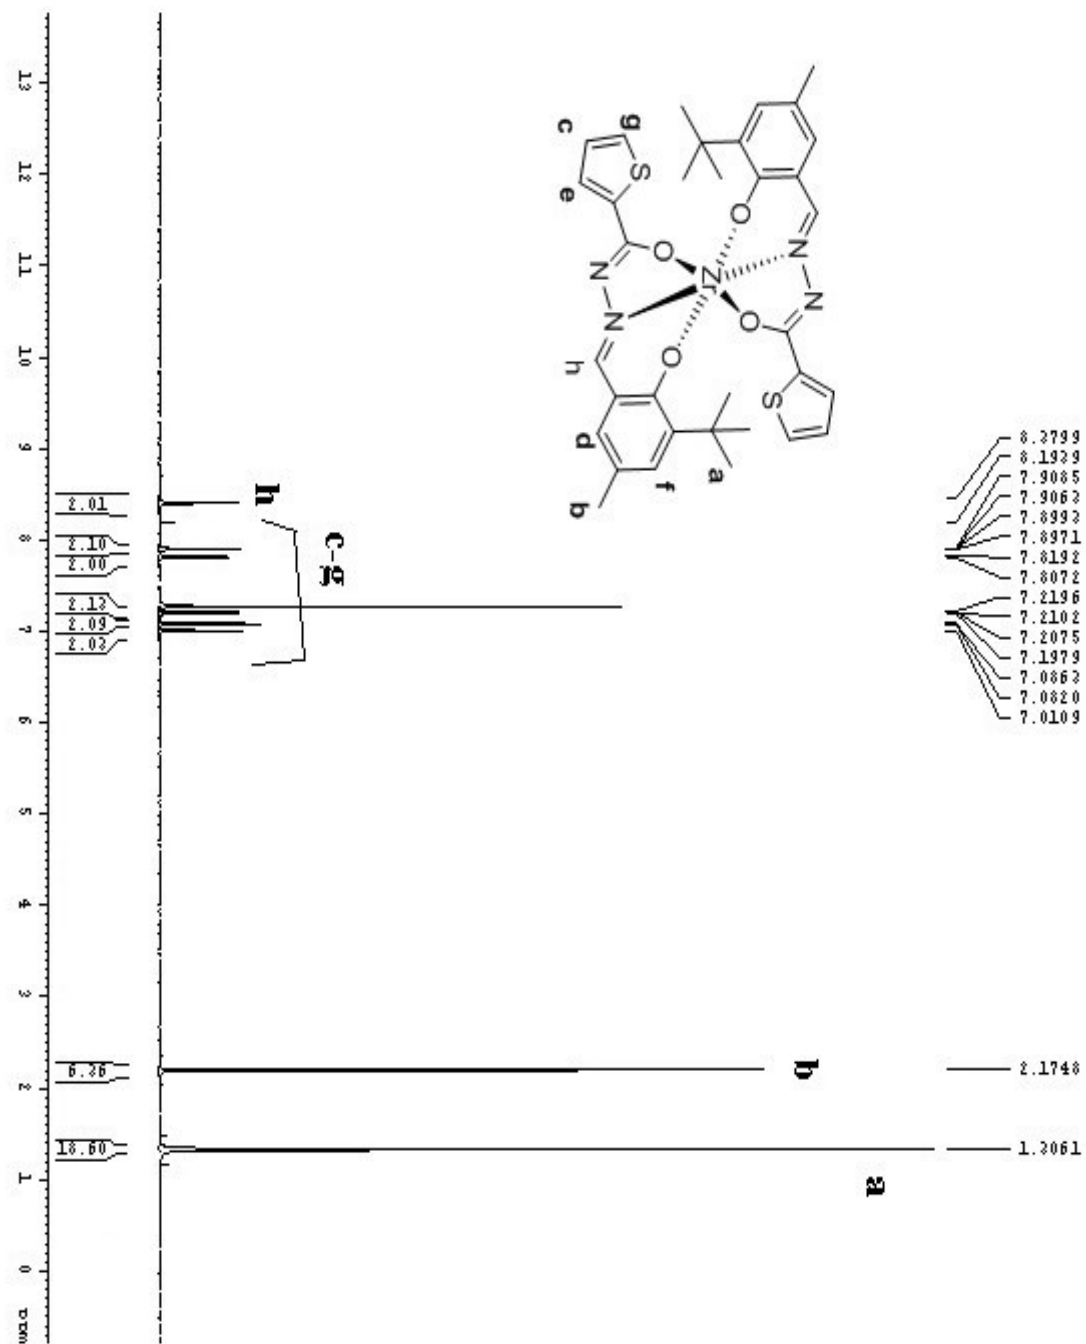

Fig. S22. <sup>1</sup>H NMR (400 MHz, CDCl<sub>3</sub>) of Compound 5

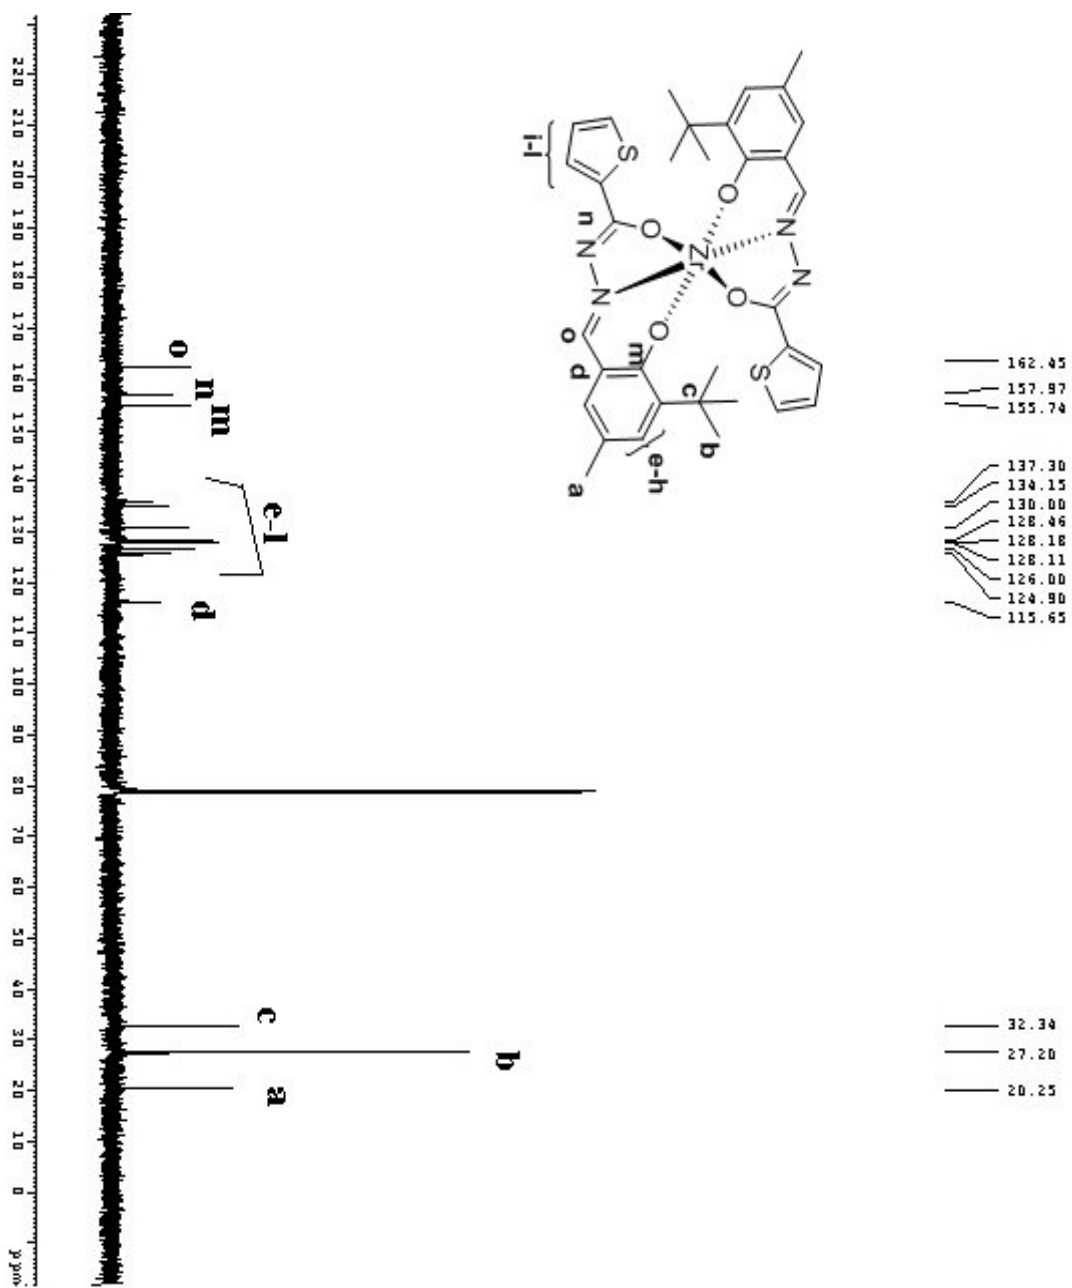

Fig. S23. <sup>13</sup>C NMR (100 MHz, CDCl<sub>3</sub>) of Compound 5



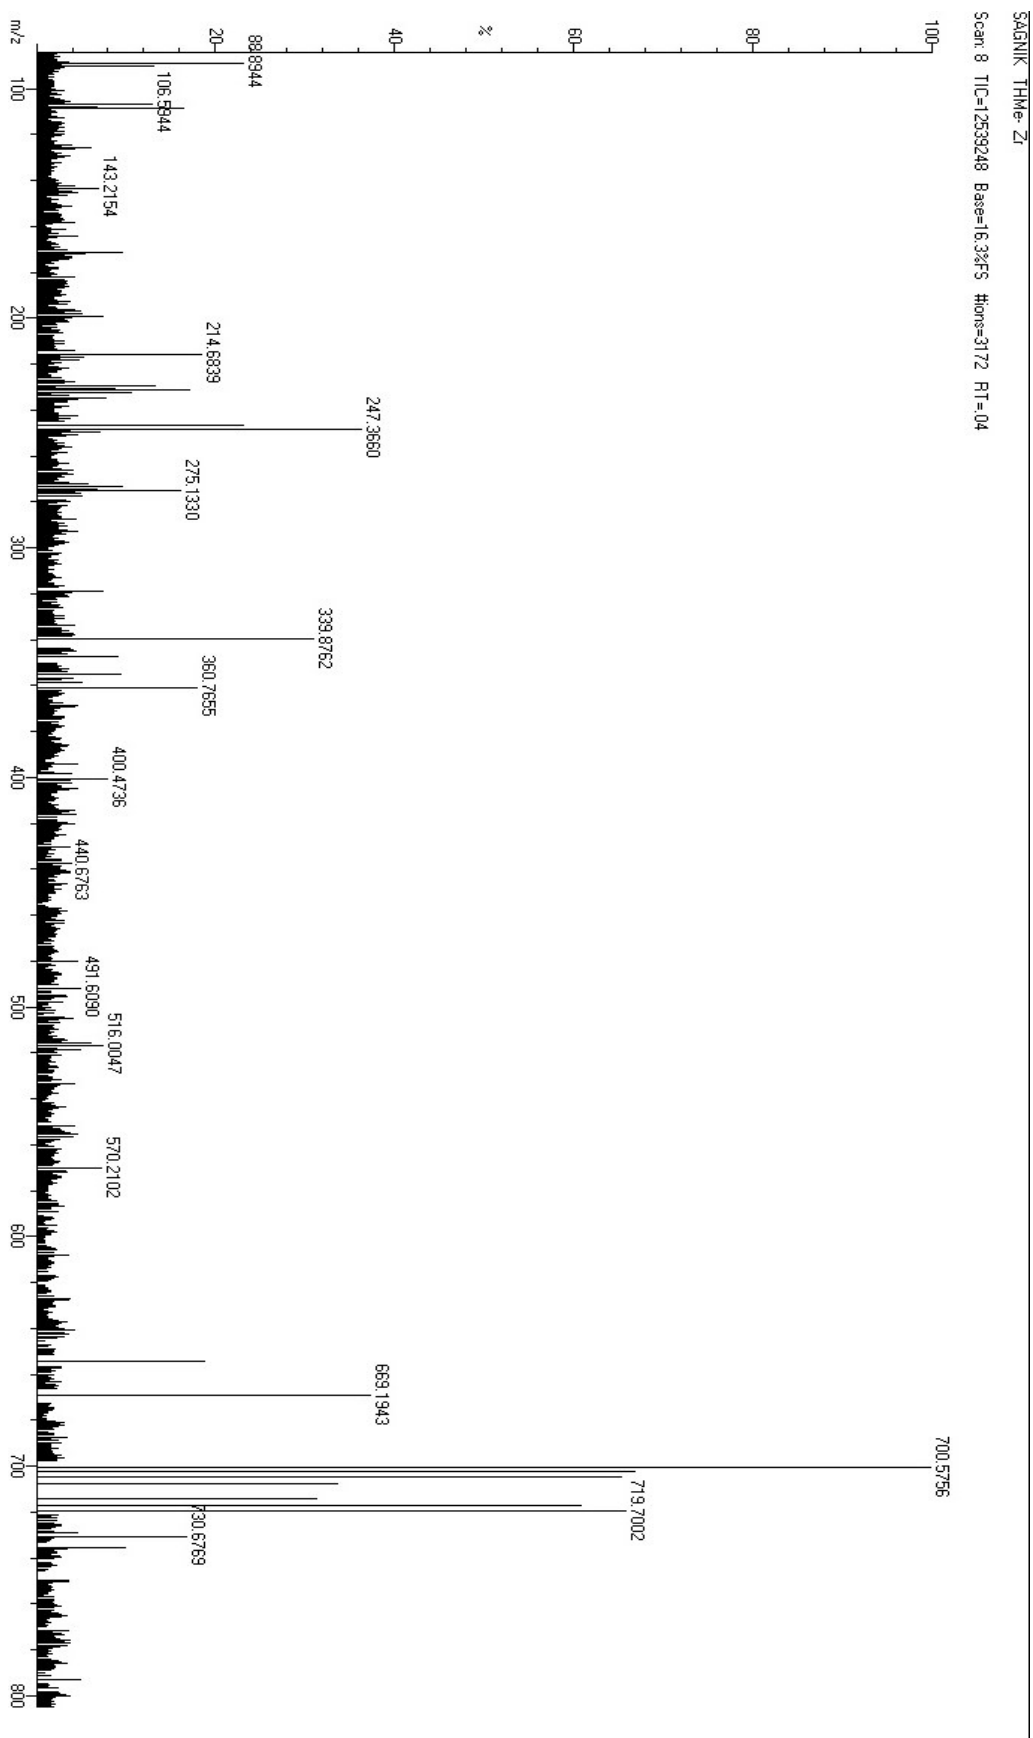

Fig. S24. ESI mass spectrum of Compound 5

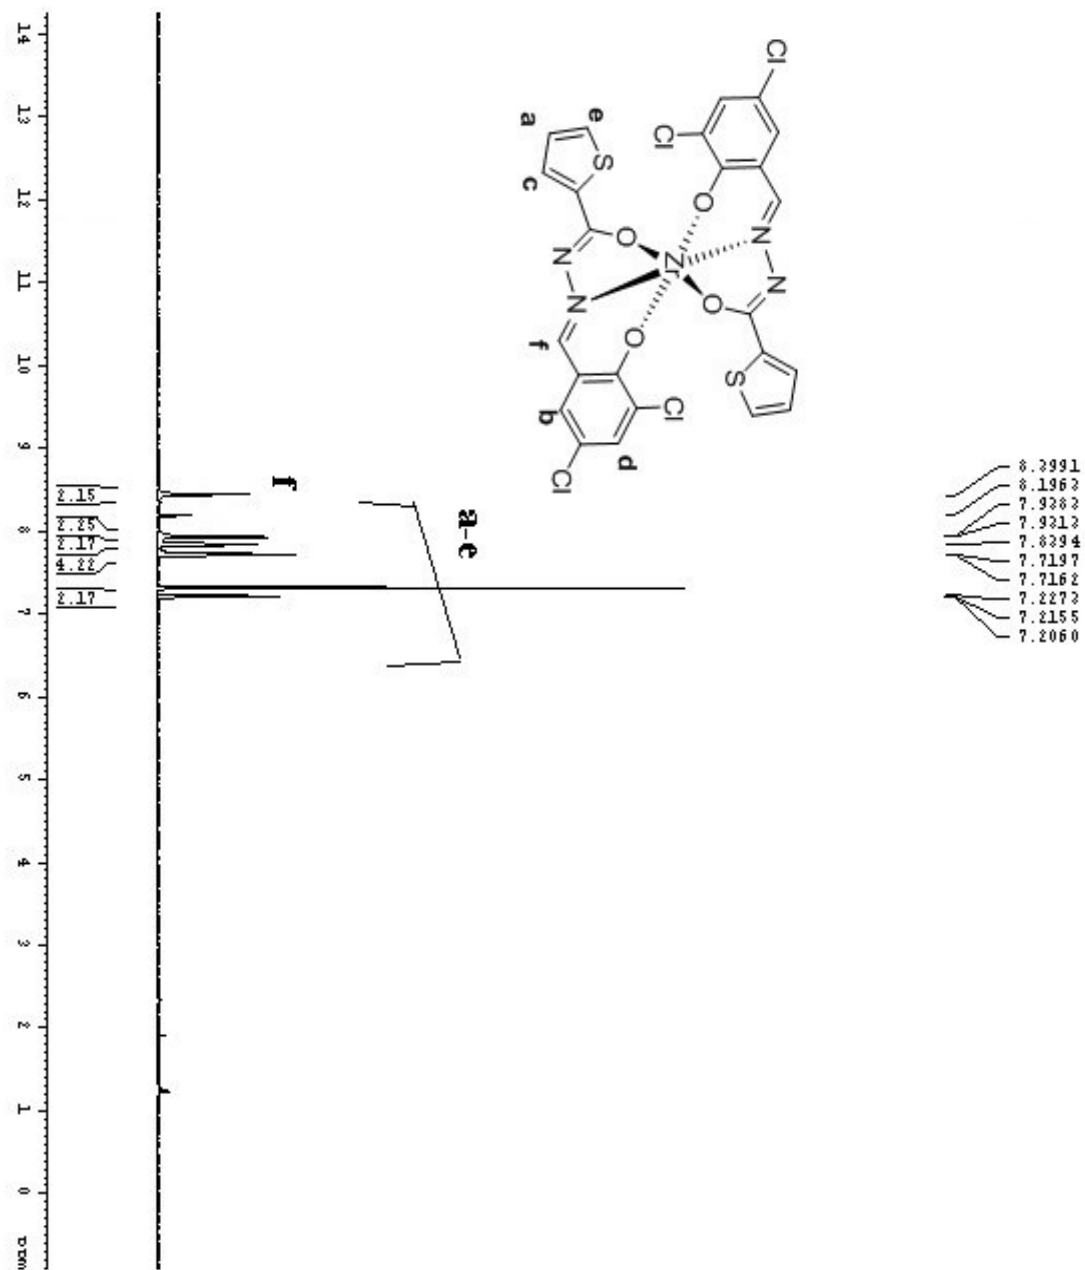

**Fig. S25.** <sup>1</sup>H NMR (400 MHz, CDCl<sub>3</sub>) of Compound 6

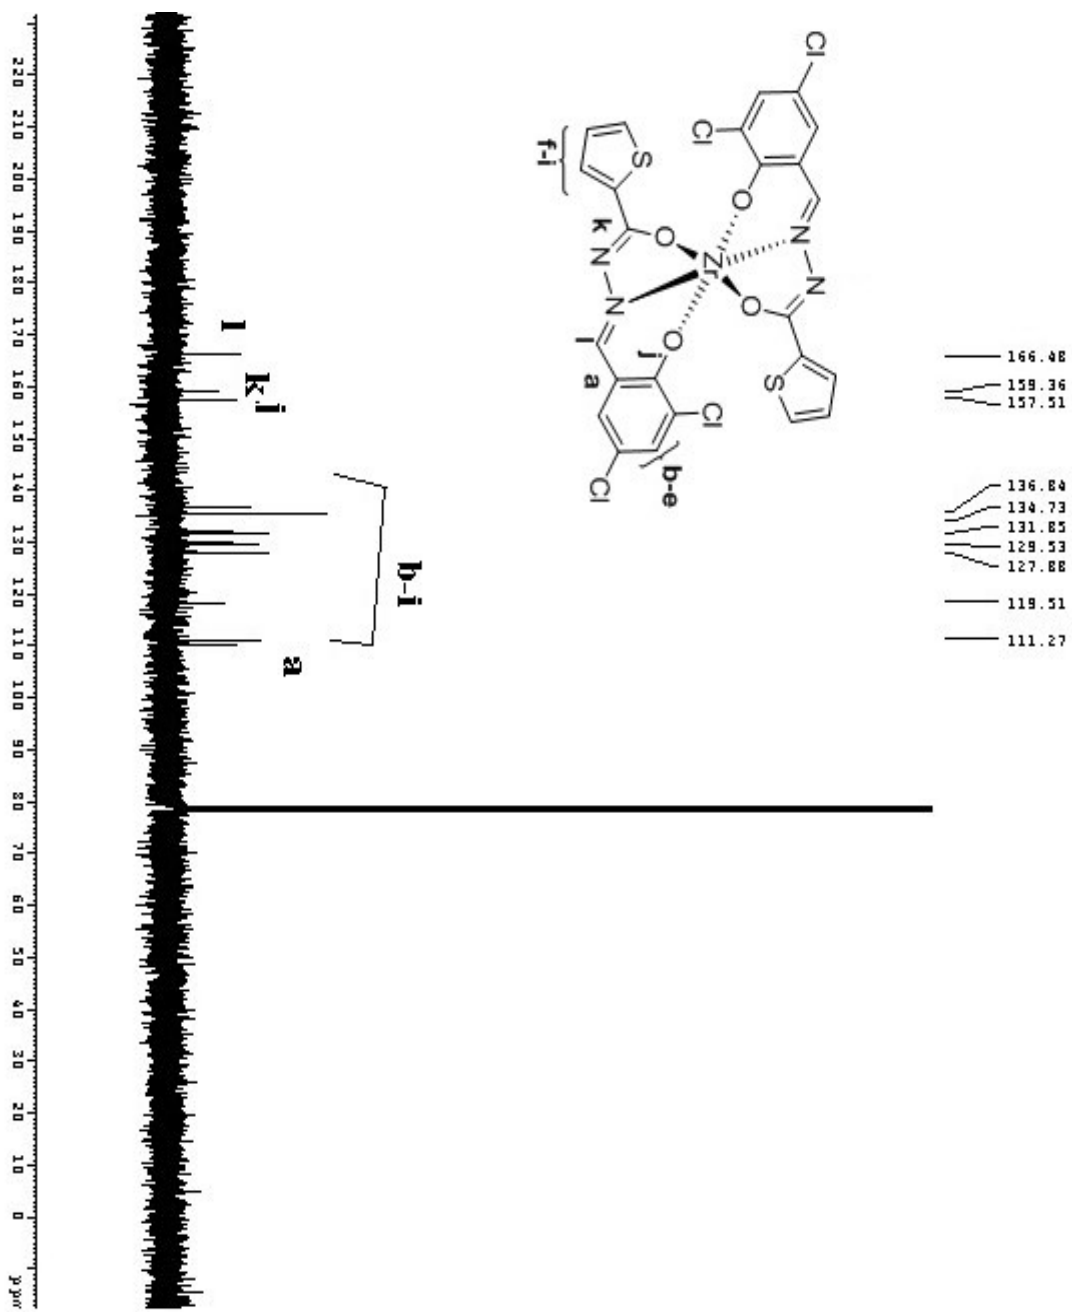

Fig. S26. <sup>13</sup>C NMR (100 MHz, CDCl<sub>3</sub>) of Compound 6

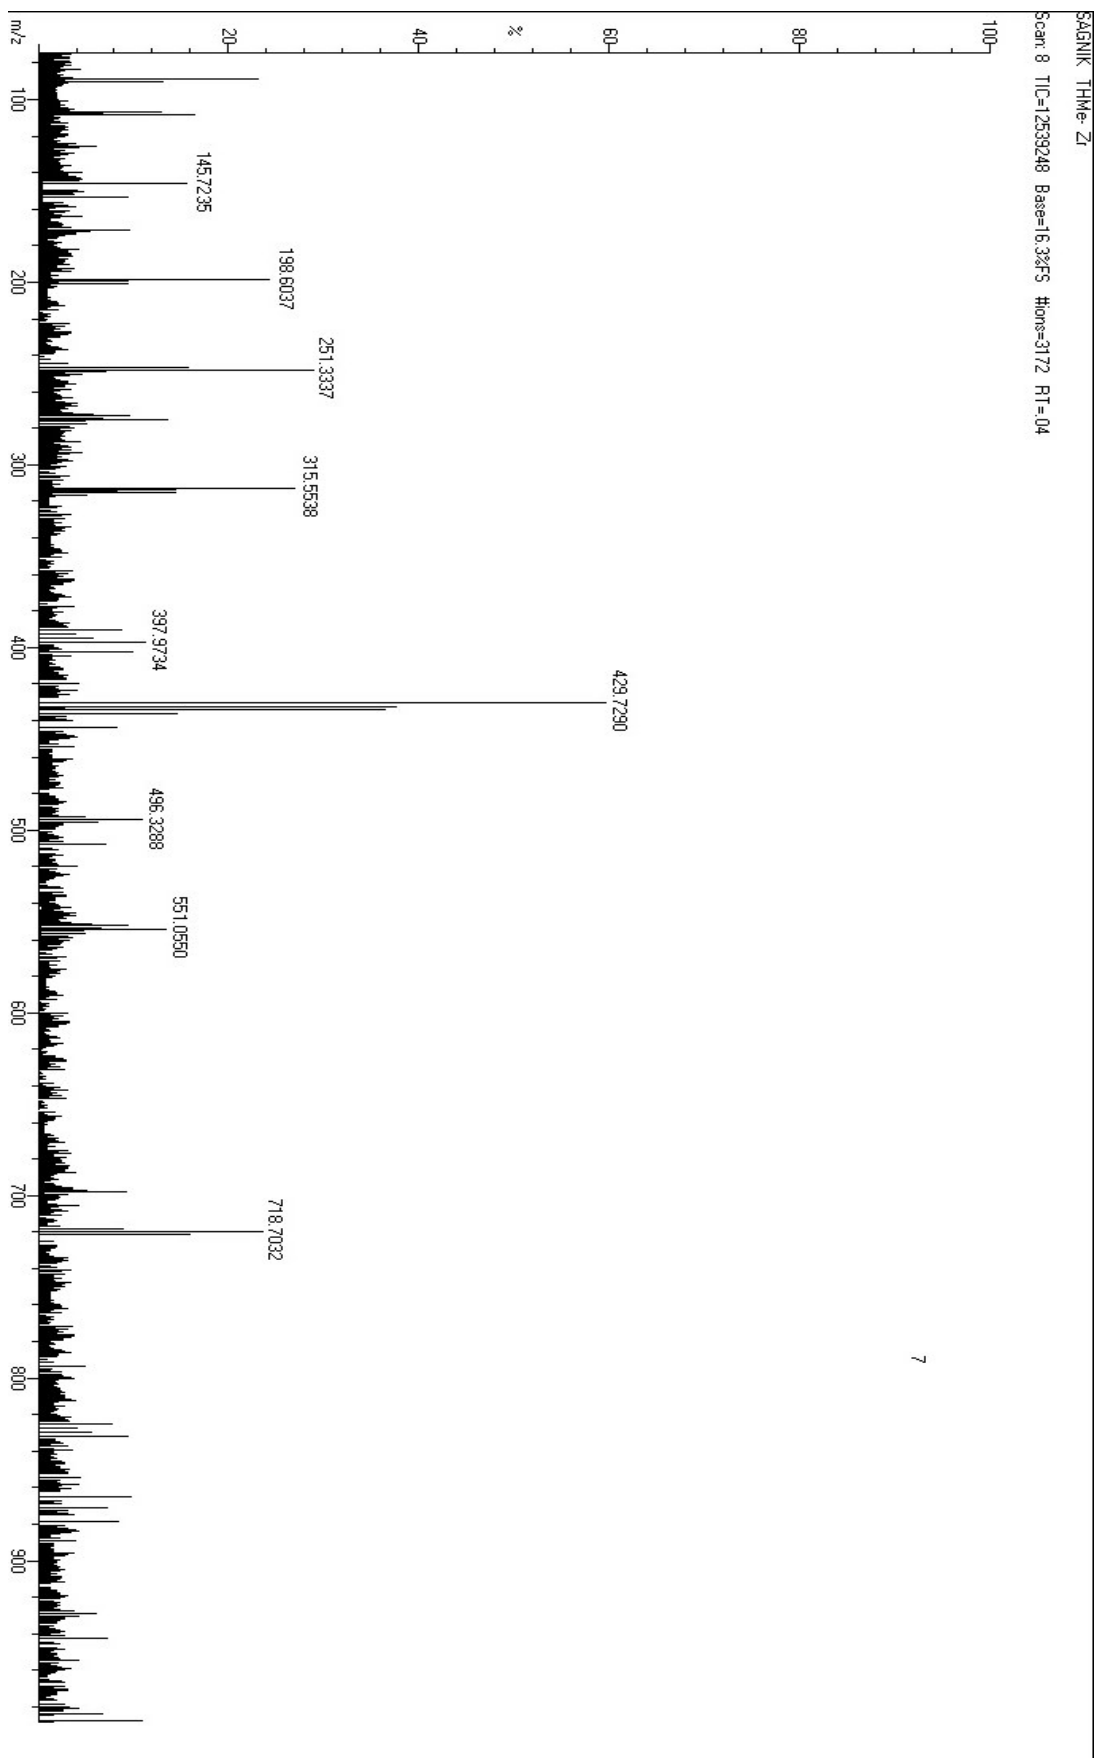

Fig. S27. ESI mass spectrum of Compound 6

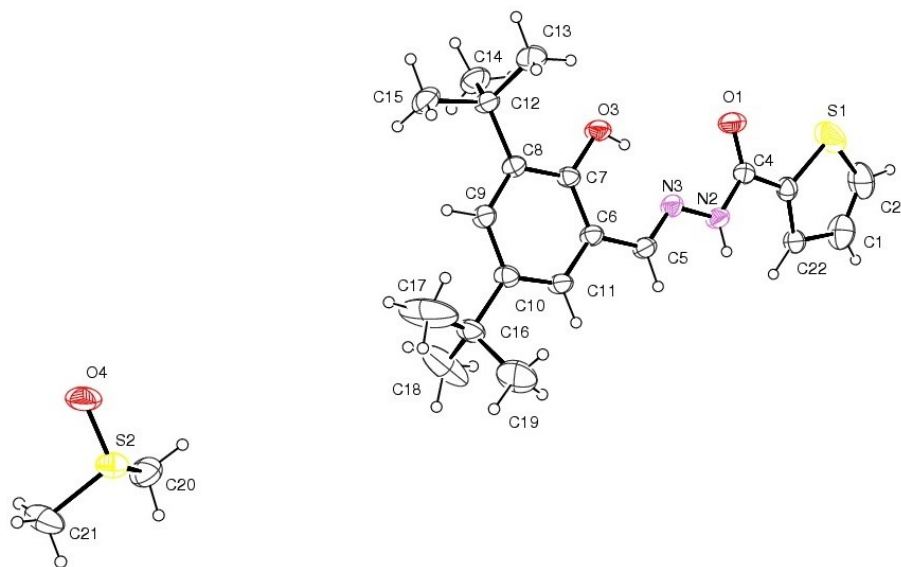

**Fig. S28.** Molecular structure of L1H<sub>2</sub>

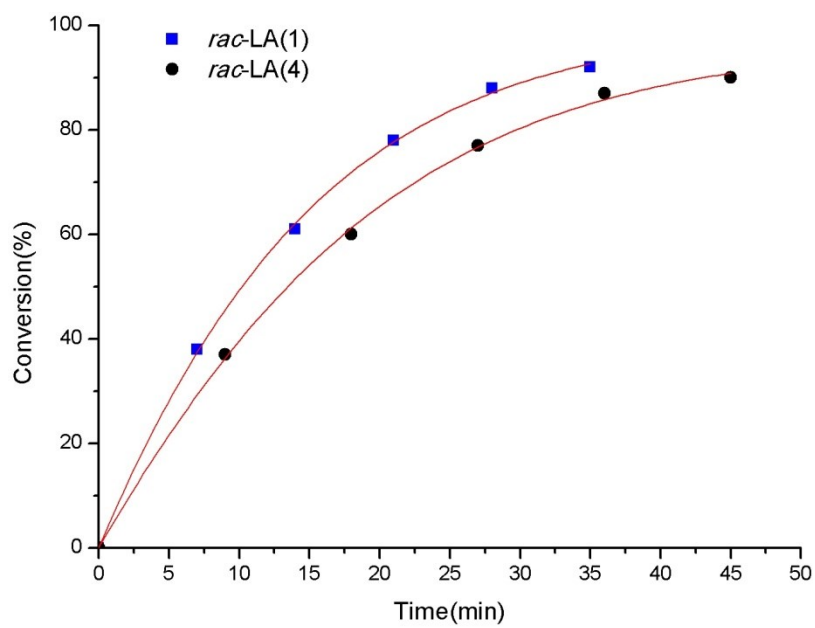

**Fig. S29.** *rac*-LA conversion vs. time plot using **1** and **4**:  $[M]_0/[Cat]_0 = 200$  at 140 °C

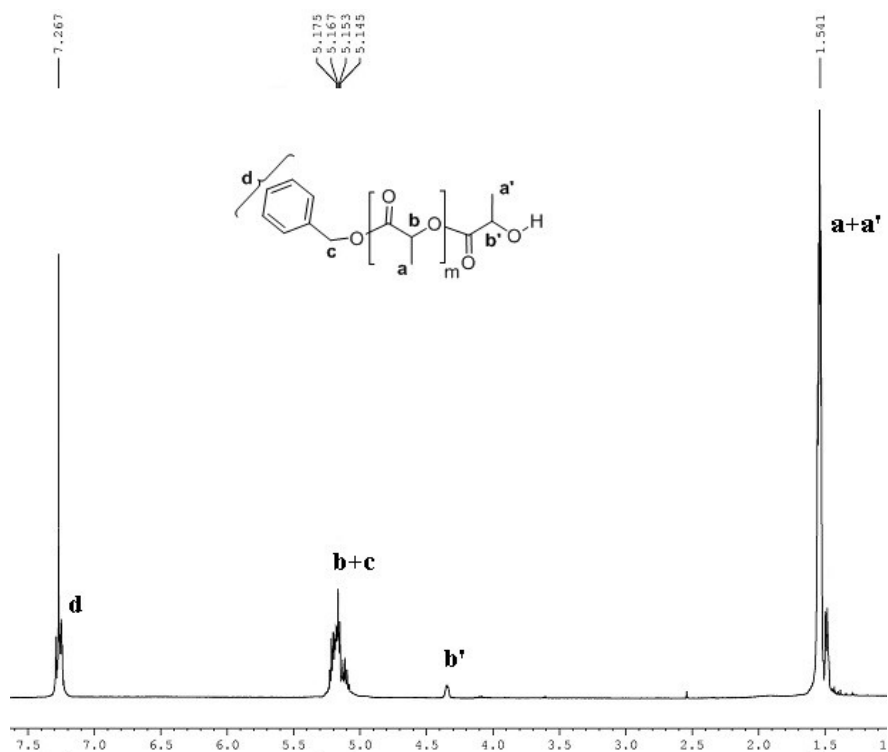

**Fig. S30.**  $^1\text{H}$  NMR spectrum (400 MHz,  $\text{CDCl}_3$ ) of the crude product obtained from a reaction between *rac*-LA and **1** and BnOH in 15: 1: 5 ratios at 140 °C.

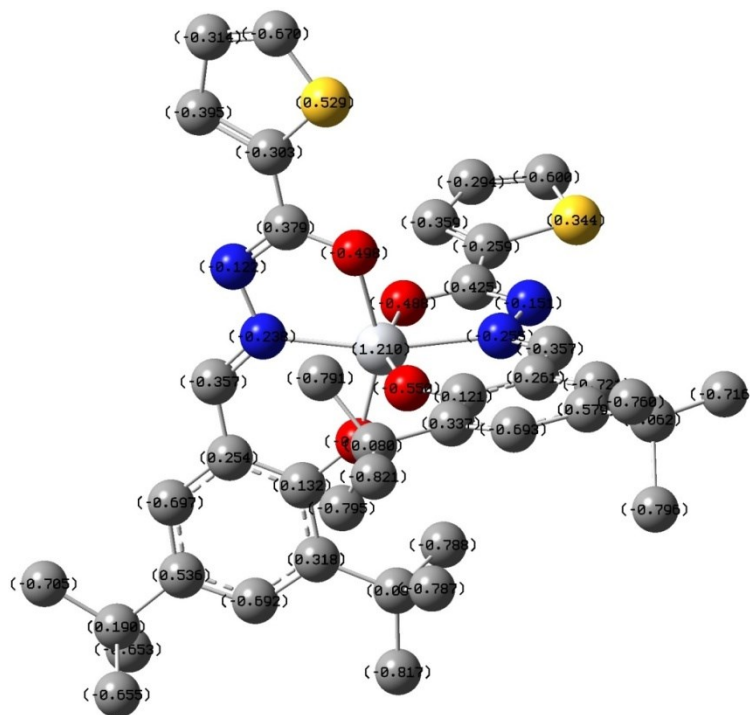

**Fig. S31.** Net Mulliken charge analysis of the optimized geometry of **1**.

**Table S1.** Crystal data for the structure **L1H<sub>2</sub>, L2H<sub>2</sub>, 1, 2 and 4**

| Compound                                      | L1H <sub>2</sub> .DMSO                                                       | L2H <sub>2</sub> .DMSO                                                       | 1                                                                                     | 2                                                                               | 4                                                                               |
|-----------------------------------------------|------------------------------------------------------------------------------|------------------------------------------------------------------------------|---------------------------------------------------------------------------------------|---------------------------------------------------------------------------------|---------------------------------------------------------------------------------|
| Molecular formula                             | C <sub>22</sub> H <sub>32</sub> N <sub>2</sub> O <sub>3</sub> S <sub>2</sub> | C <sub>19</sub> H <sub>26</sub> N <sub>2</sub> O <sub>3</sub> S <sub>2</sub> | C <sub>40.03</sub> H <sub>46.03</sub> N <sub>4</sub> O <sub>4</sub> S <sub>2</sub> Ti | C <sub>34</sub> H <sub>36</sub> N <sub>4</sub> O <sub>4</sub> S <sub>2</sub> Ti | C <sub>40</sub> H <sub>48</sub> N <sub>4</sub> O <sub>4</sub> S <sub>2</sub> Zr |
| Formula weight                                | 436.61                                                                       | 394.54                                                                       | 758.83                                                                                | 676.69                                                                          | 804.16                                                                          |
| T/K                                           | 296(2)                                                                       | 296(2)                                                                       | 296(2)                                                                                | 296(2)                                                                          | 296(2)                                                                          |
| Wavelength (Å)                                | 0.71073                                                                      | 0.71073                                                                      | 0.71073                                                                               | 0.71073                                                                         | 0.71073                                                                         |
| Crystal system                                | Triclinic                                                                    | Triclinic                                                                    | Monoclinic                                                                            | Monoclinic                                                                      | Monoclinic                                                                      |
| Space group                                   | <i>P1</i>                                                                    | <i>P1</i>                                                                    | <i>P2<sub>1</sub>/c</i>                                                               | <i>P2<sub>1</sub>/n</i>                                                         | <i>P2<sub>1</sub>/c</i>                                                         |
| a/Å                                           | 9.2586(2)                                                                    | 9.8710(3)                                                                    | 17.7190(9)                                                                            | 13.081(4)                                                                       | 17.8233(9)                                                                      |
| b/Å                                           | 9.6167(2)                                                                    | 9.8841(3)                                                                    | 10.8186(5)                                                                            | 23.840(8)                                                                       | 10.9084(6)                                                                      |
| c/Å                                           | 15.5862(4)                                                                   | 10.9592(3)                                                                   | 21.7958(11)                                                                           | 15.426(5)                                                                       | 21.6049(11)                                                                     |
| α (°)                                         | 89.2238(12)                                                                  | 98.4485(11)                                                                  | 90                                                                                    | 90                                                                              | 90                                                                              |
| β (°)                                         | 75.0508(11)                                                                  | 94.8760(11)                                                                  | 93.293(2)                                                                             | 101.148(12)                                                                     | 94.0606(18)                                                                     |
| γ (°)                                         | 65.7927(10)                                                                  | 94.1161(12)                                                                  | 90                                                                                    | 90                                                                              | 90                                                                              |
| V/Å <sup>3</sup>                              | 1216.17(5)                                                                   | 1049.95(5)                                                                   | 4171.2(4)                                                                             | 4720(3)                                                                         | 4190.0(4)                                                                       |
| Z, Calculated density(Mg/ m <sup>3</sup> )    | 2, 1.192                                                                     | 2, 1.248                                                                     | 4, 1.208                                                                              | 4, 0.952                                                                        | 4, 1.275                                                                        |
| Absorption coefficient (mm <sup>-1</sup> )    | 0.242                                                                        | 0.273                                                                        | 0.347                                                                                 | 0.301                                                                           | 0.404                                                                           |
| Reflections collected/Independent reflections | 16707 / 4271                                                                 | 15632 / 3699                                                                 | 14548 / 3837                                                                          | 13883 / 4625                                                                    | 31084 / 7376                                                                    |
| Data/restraints/parameters                    | 4271 / 0 / 278                                                               | 3699 / 0 / 249                                                               | 3837 / 68 / 535                                                                       | 4625 / 6 / 424                                                                  | 7376 / 50 / 514                                                                 |
| Goodness of fit on F <sup>2</sup>             | 1.037                                                                        | 1.042                                                                        | 1.057                                                                                 | 1.111                                                                           | 1.077                                                                           |
| Final R indices [ <i>I</i> > 2σ( <i>I</i> )]  | <i>R</i> <sub>1</sub> = 0.0737,<br><i>wR</i> <sub>2</sub> = 0.2182           | <i>R</i> <sub>1</sub> = 0.0743,<br><i>wR</i> <sub>2</sub> = 0.2076           | <i>R</i> <sub>1</sub> = 0.0471,<br><i>wR</i> <sub>2</sub> = 0.1194                    | <i>R</i> <sub>1</sub> = 0.0585,<br><i>wR</i> <sub>2</sub> = 0.1552              | <i>R</i> <sub>1</sub> = 0.0374,<br><i>wR</i> <sub>2</sub> = 0.0951              |
| R indices (all data)                          | <i>R</i> <sub>1</sub> = 0.0850,<br><i>wR</i> <sub>2</sub> = 0.2338           | <i>R</i> <sub>1</sub> = 0.0832,<br><i>wR</i> <sub>2</sub> = 0.2207           | <i>R</i> <sub>1</sub> = 0.0730,<br><i>wR</i> <sub>2</sub> = 0.1493                    | <i>R</i> <sub>1</sub> = 0.0769,<br><i>wR</i> <sub>2</sub> = 0.1676              | <i>R</i> <sub>1</sub> = 0.0569,<br><i>wR</i> <sub>2</sub> = 0.1113              |
| CCDC                                          | 1562812                                                                      | 1562816                                                                      | 1562817                                                                               | 1562818                                                                         | 1562819                                                                         |

$$R_1 = \frac{\sum |F_o| - |F_c|}{\sum |F_o|}, wR_2 = \left[ \frac{\sum (F_o^2 - F_c^2)^2}{\sum w(F_o^2)^2} \right]^{1/2}$$
